# Supplementary material for: Patients with Achilles Tendon Rupture Have a Degenerated Contralateral Achilles Tendon: An Elastography Study
Source: Biomed Res Int. 2018 Dec 6;2018:2367615. doi: 10.1155/2018/2367615 (PMC6304598; doi:10.1155/2018/2367615)
Supplement: Supplementary Materials — The Achilles tendon (AT) was divided into three parts to analyze. The first SHEET showed the proximal part of the AT and the SHEET 2 and SHEET 3 represented the middle and distal part, respectively. In each SHEET, the first COLUMN showed the name of each person and the second one to the sixth one represented the gender (男: male; 女: female), age, included at the side of AT (L: left; R: right), part of the AT (P: proximal; M: middle; D: distal), and group (A: asymptomatic; N: normal), respectively. The following COLUMN was the various kinds of parameters about hardness and morphology of AT that we are concerned about. [file 2367615.f1.xls]

## Sheet: proximal
姓名	性别	年龄	检查侧L/R	P/M/D	分组A/N	Hmean	stdV	CoV	Hskew	kurtV	EntropyHis1	EntropyBrt1	EntropyHis2	EntropyBrt2	q0	q0.05	q0.1	0.15	0.2	0.25	0.3	0.35	0.4	0.45	H50	0.55	0.6	0.65	0.7	0.75	0.8	0.85	0.9	0.95	q1	meanROI	medianROI	meanRatio	medianRatio	meanRatio2	medianRatio2	max(Thickness),	median(Vthk)厚度	mean(Vthk)厚度	max(Vlong),	median(Vlong),	mean(Vlong)	areaOri,	Rlong,
李青	男	25	R	p	A	0.491793	0.156647	0.318522	-0.185434	1.69272	6.87369	0.991715	6.49135	0.994416	0.0833333	0.248807	0.279492	0.301792	0.325888	0.346431	0.373028	0.407187	0.435917	0.47444	0.510506	0.532458	0.553074	0.588168	0.628612	0.653915	0.670391	0.68746	0.690124	0.691186	0.833333	0.414356	0.432541	1.21089	1.19447	1.00964	0.981985	0.422222	0.4	0.357385	1.37778	1.23333	1.1241	0.502068	1.446
陈宇	男	27	R	p	A	0.369914	0.157071	0.424615	-0.430587	2.90487	7.38262	0.98907	7.10992	0.98907	0	0.0396948	0.147229	0.203666	0.258135	0.2926	0.313092	0.328815	0.341092	0.357852	0.37582	0.397416	0.416667	0.440664	0.459738	0.48494	0.50185	0.520514	0.560219	0.614313	0.806902	0.413984	0.414249	0.823536	0.832485	0.865258	0.864028	0.689815	0.546296	0.515807	1.42593	1.19676	1.0684	0.744513	1.44094
吴杰	男	28	R	p	A	0.377392	0.0899503	0.238347	-0.683784	3.30784	7.13389	0.995058	6.28871	0.996728	0.0635679	0.216644	0.265268	0.2926	0.311	0.323968	0.333333	0.338686	0.348971	0.364037	0.382553	0.403569	0.418542	0.432131	0.440904	0.455906	0.463001	0.469297	0.476543	0.498072	0.548556	0.402753	0.386407	0.91851	0.985307	1.04286	1.1142	0.351852	0.328704	0.300357	1.125	1.02778	0.891957	0.344522	1.20499
胡寅	男	30	L	p	A	0.35192	0.101521	0.288477	-0.472234	3.28686	7.44622	0.99532	6.63354	0.99532	0	0.174012	0.224723	0.257556	0.279534	0.294217	0.305869	0.315275	0.324618	0.336118	0.349833	0.363806	0.378898	0.395097	0.410461	0.427976	0.447325	0.463678	0.486807	0.50688	0.564556	0.448647	0.451818	0.748133	0.67653	0.790842	0.8396	0.452214	0.41958	0.378606	1.41725	1.32168	1.20004	0.550334	1.49697
钱永明	男	30	R	p	A	0.502793	0.132877	0.264277	-0.284479	2.34218	7.13062	0.995741	6.77502	0.996398	0.0378874	0.287817	0.329683	0.351888	0.370825	0.392573	0.420095	0.44971	0.475144	0.494828	0.511687	0.527842	0.546033	0.570037	0.592922	0.608057	0.630012	0.661221	0.693962	0.697386	0.815037	0.439338	0.449768	1.23674	1.35345	1.37241	1.41442	0.553488	0.493023	0.462343	1.49302	1.32093	1.21388	0.691444	1.57974
王峥月	男	31	R	p	A	0.335013	0.165246	0.493253	-0.174439	2.317	7.40928	0.984745	7.17578	0.984745	0	0.0181642	0.101159	0.153014	0.187432	0.216644	0.248837	0.279492	0.303925	0.325888	0.342573	0.357852	0.376811	0.397416	0.424898	0.460947	0.497958	0.525926	0.553074	0.597433	0.833333	0.455072	0.476543	0.702085	0.679941	0.713968	0.661298	0.42577	0.380952	0.361184	1.56303	1.48459	1.36807	0.575352	1.69294
王强	男	31	R	p	A	0.377471	0.145178	0.384606	-0.213729	2.3369	7.29122	0.991488	7.06303	0.991488	0	0.134209	0.174318	0.209154	0.235531	0.259661	0.294162	0.320411	0.342573	0.369826	0.397416	0.422631	0.440904	0.45626	0.468458	0.48494	0.50185	0.522814	0.555352	0.595401	0.833333	0.450358	0.482098	0.812184	0.76863	0.978876	0.853103	0.422222	0.383333	0.35089	1.58333	1.31111	1.14145	0.568333	1.70594
孙磊	男	32	L	p	A	0.440937	0.173812	0.394187	-0.903997	3.14954	7.4797	0.989276	7.01208	0.989276	0	0.028591	0.190124	0.271273	0.314281	0.341092	0.368696	0.395396	0.421501	0.451624	0.480682	0.503882	0.525926	0.543105	0.565391	0.582108	0.597433	0.611223	0.629147	0.652198	0.67555	0.444371	0.491394	0.990953	0.976305	1.12992	1.06477	0.455556	0.377778	0.366875	1.62778	1.53333	1.31365	0.608302	1.74069
张奚	女	32	R	p	A	0.426762	0.149796	0.351007	-0.192091	2.33141	7.25289	0.993165	7.03374	0.993237	0.00201204	0.181726	0.226886	0.259661	0.289855	0.313462	0.333333	0.357852	0.381515	0.403569	0.432131	0.459738	0.488843	0.509627	0.528915	0.540262	0.560219	0.587994	0.61829	0.679589	0.833333	0.458773	0.503828	0.917103	0.831227	0.943644	0.831227	0.566667	0.488889	0.457774	1.59444	1.39444	1.24263	0.741327	1.68819
邢天浩	男	32	R	p	A	0.488552	0.165676	0.339117	-1.2931	3.99746	7.27324	0.99249	6.94244	0.99249	0	0.097802	0.200772	0.335234	0.383842	0.423357	0.461395	0.49213	0.508101	0.521081	0.531006	0.546334	0.56254	0.578773	0.592781	0.605139	0.618307	0.634133	0.651866	0.670468	0.780259	0.428931	0.464451	1.18882	1.30595	1.26891	1.59302	0.530233	0.446512	0.430523	1.48372	1.36279	1.16568	0.647701	1.60094
高彩红	女	32	L	p	A	0.414601	0.157719	0.380412	-0.613568	2.3151	7.57445	0.99123	6.97057	0.99123	0	0.126186	0.177676	0.224138	0.269781	0.303467	0.324563	0.34296	0.384051	0.423269	0.452616	0.478609	0.504306	0.52562	0.542817	0.558645	0.567632	0.577111	0.587453	0.59926	0.651889	0.434724	0.426499	0.946623	1.07975	0.771151	0.699071	0.353488	0.330233	0.314151	1.36744	1.31163	1.20966	0.436733	1.49818
邓可爱	男	33	R	p	A	0.467658	0.173456	0.370902	-0.976863	3.73684	7.17551	0.989889	6.77793	0.989889	0	0.0313863	0.240174	0.325348	0.35679	0.381208	0.408099	0.432131	0.457102	0.48384	0.5	0.514857	0.529001	0.539508	0.5516	0.57874	0.623965	0.662992	0.68746	0.691186	0.698986	0.468113	0.509179	0.998932	0.978315	0.954233	0.821157	0.341737	0.302521	0.27582	1.35014	1.23249	1.085	0.391027	1.42991
钱连义	男	33	L	p	A	0.462475	0.131524	0.28439	-0.345968	2.29509	7.25922	0.995185	6.87758	0.995724	0.0248563	0.235531	0.287954	0.316289	0.333333	0.355326	0.380318	0.403569	0.427676	0.45626	0.480948	0.50185	0.519872	0.535865	0.550568	0.56647	0.584527	0.611223	0.628612	0.647229	0.745165	0.466969	0.519872	0.987886	0.890821	0.877293	0.721422	0.694215	0.600551	0.55443	1.55372	1.39394	1.24223	0.873073	1.5884
丁晓光	男	33	L	p	A	0.499955	0.117499	0.235019	-1.43433	5.78645	7.14985	0.996552	6.65876	0.996552	0	0.281706	0.343668	0.389885	0.423295	0.452269	0.471993	0.485804	0.49899	0.511171	0.523572	0.534569	0.545336	0.555707	0.567406	0.580414	0.594716	0.607952	0.624879	0.642593	0.705272	0.431919	0.476483	1.19598	1.16644	1.21556	1.33884	0.423256	0.362791	0.331504	1.48837	1.33023	1.17189	0.503451	1.53553
潘明骏	男	34	R	p	A	0.281255	0.123005	0.437344	-0.0284746	2.92525	7.44888	0.98852	6.86626	0.98852	0	0.0571389	0.106148	0.150267	0.178985	0.202029	0.223806	0.242555	0.262392	0.277791	0.292362	0.303536	0.316433	0.32535	0.337573	0.355326	0.37582	0.395038	0.433911	0.487862	0.630365	0.447304	0.471184	0.572964	0.552758	0.532849	0.435729	0.420168	0.380952	0.342524	1.38375	1.19608	1.10687	0.485622	1.43082
王胜	男	34	L	p	A	0.479179	0.101147	0.211083	-0.487694	3.02876	7.22531	0.995581	6.56539	0.997579	0.116218	0.316948	0.346431	0.369593	0.390311	0.410886	0.427676	0.440904	0.456643	0.473697	0.486153	0.498125	0.512586	0.528915	0.543105	0.563155	0.575682	0.589456	0.602095	0.625016	0.695235	0.440494	0.465005	1.10834	1.06552	0.961331	0.748635	0.459384	0.392157	0.377541	1.64146	1.53501	1.35156	0.63106	1.76148
季骆阳	男	35	R	p	A	0.504987	0.123425	0.244413	-1.4372	5.12367	6.8718	0.996195	6.43172	0.996195	0	0.27071	0.337161	0.37582	0.412482	0.435087	0.464812	0.492453	0.511157	0.53232	0.548556	0.563155	0.57392	0.584527	0.591679	0.597433	0.602095	0.607969	0.616573	0.623965	0.67952	0.427599	0.480682	1.23611	1.26387	1.17738	1.15542	0.405594	0.34965	0.324727	1.21212	1.08159	0.968584	0.399281	1.24222
吴建生	男	37	L	p	A	0.304578	0.17002	0.558217	0.0289393	1.85776	7.74266	0.980724	7.16988	0.980724	0	0.0343124	0.0824594	0.116228	0.140115	0.160876	0.178985	0.2037	0.235531	0.268761	0.302658	0.331483	0.365326	0.396994	0.422631	0.451444	0.480948	0.505428	0.532458	0.578499	0.61829	0.484112	0.620903	0.605849	0.457363	0.635811	0.455625	0.394444	0.333333	0.316139	1.20556	1.05556	0.969026	0.394969	1.28227
李欣	男	38	L	p	A	0.479161	0.135455	0.282692	-0.973217	3.81695	7.4309	0.995206	6.92264	0.995228	0.000886372	0.1934	0.294728	0.341203	0.383623	0.408656	0.434963	0.457206	0.474783	0.487401	0.5	0.514586	0.526726	0.541788	0.559541	0.57864	0.598938	0.619737	0.636407	0.655658	0.69074	0.444413	0.5	1.09683	1	1.2497	1.46931	0.427907	0.395349	0.363153	1.42791	1.34419	1.22172	0.526901	1.51832
李贵超	男	39	R	p	A	0.477492	0.121276	0.253985	-0.453815	2.64865	7.32596	0.994787	6.83252	0.996596	0.0856893	0.25	0.299181	0.332373	0.369656	0.397201	0.420843	0.44737	0.467064	0.484788	0.498031	0.509078	0.521081	0.53527	0.551635	0.565292	0.580708	0.59722	0.614875	0.661956	0.794728	0.454739	0.507012	1.06753	0.940012	0.795869	0.747047	0.486111	0.472222	0.441269	1.43981	1.40046	1.30739	0.643861	1.56757
陈晓波	男	41	L	p	A	0.412167	0.166106	0.403008	-0.367269	2.10122	7.5785	0.99009	7.12891	0.99009	0	0.127524	0.190124	0.22494	0.248377	0.273998	0.303925	0.329715	0.359637	0.403222	0.445369	0.475144	0.496325	0.511157	0.52935	0.553074	0.578499	0.599208	0.61829	0.634674	0.692027	0.458944	0.523457	0.887194	0.820042	0.776744	0.689868	0.4	0.369444	0.334581	1.30556	1.18889	1.09406	0.445957	1.37449
孟淑燕	女	41	L	p	A	0.240224	0.190802	0.794266	0.570695	2.3947	7.31226	0.964609	7.04944	0.964609	0	0.00855277	0.012696	0.0166724	0.0283919	0.0615915	0.102948	0.14145	0.166667	0.189134	0.214088	0.239078	0.262942	0.29448	0.330428	0.369503	0.410328	0.461682	0.529277	0.617279	0.833333	0.438118	0.473496	0.505726	0.402547	0.461169	0.354154	0.437209	0.395349	0.362211	1.22791	1.13023	1.0187	0.45218	1.29115
李强	男	41	L	p	A	0.408208	0.162154	0.397234	-0.37436	2.1498	7.67168	0.990993	7.12646	0.990993	0	0.11527	0.185164	0.228312	0.265999	0.293007	0.311954	0.328694	0.349718	0.377741	0.415335	0.467385	0.497182	0.5171	0.530719	0.547468	0.565559	0.58783	0.611366	0.629899	0.679764	0.429927	0.472497	0.93821	0.864544	0.944433	0.973622	0.44186	0.413953	0.374542	1.48837	1.35814	1.20051	0.566144	1.56922
王来	女	42	R	p	A	0.531678	0.156861	0.295031	-1.48216	4.64034	6.91642	0.994161	6.58914	0.994161	0	0.156055	0.297252	0.364037	0.441303	0.484149	0.517045	0.535731	0.555352	0.568258	0.57721	0.591203	0.600096	0.612854	0.628612	0.640115	0.65912	0.668492	0.682148	0.690124	0.719741	0.40775	0.408321	1.37987	1.55696	1.89928	2.37971	0.427778	0.361111	0.334444	1.68889	1.51111	1.32393	0.576111	1.72451
缪利民	男	42	R	p	A	0.457211	0.183076	0.400419	-0.354468	2.10157	7.12125	0.990179	6.87088	0.990179	0	0.145586	0.187635	0.234924	0.287954	0.322469	0.350378	0.377727	0.414292	0.451444	0.476543	0.498072	0.517045	0.548722	0.5961	0.635564	0.666667	0.683257	0.690124	0.690857	0.833333	0.434202	0.45626	1.07033	1.07986	1.15099	1.27929	0.607595	0.540084	0.494203	1.85654	1.67932	1.49994	0.941658	1.93848
戚伟刚	男	42	R	p	A	0.217474	0.115049	0.529024	0.664665	3.44739	7.56218	0.984502	6.75222	0.984502	0	0.0413727	0.0780543	0.104684	0.127073	0.14506	0.156991	0.168333	0.181324	0.19361	0.205749	0.218994	0.230814	0.241258	0.253879	0.273983	0.299626	0.328505	0.369758	0.458616	0.564307	0.429945	0.470405	0.481837	0.407231	0.534128	0.369807	0.330233	0.302326	0.275716	1.07907	1	0.917458	0.30384	1.12816
李洪伟	男	42	R	p	A	0.523368	0.118156	0.225761	-0.485887	2.56422	7.24617	0.995061	6.74207	0.997324	0.13013	0.308041	0.348142	0.384876	0.41539	0.448952	0.47311	0.49213	0.508221	0.521081	0.53193	0.546969	0.561653	0.57864	0.597199	0.62048	0.640975	0.658506	0.67624	0.690066	0.825464	0.442732	0.485143	1.23485	1.188	1.52128	1.67709	0.404651	0.390698	0.360011	1.63721	1.51163	1.39211	0.597685	1.74991
李永辉	男	43	R	p	A	0.482847	0.137411	0.284585	-0.74075	2.86564	7.19214	0.995332	6.92852	0.995418	0.0039943	0.223447	0.283653	0.313487	0.345658	0.386789	0.42701	0.461395	0.487401	0.50516	0.519093	0.531227	0.544217	0.555707	0.567406	0.580549	0.598393	0.618853	0.638866	0.662672	0.833333	0.408562	0.424447	1.24239	1.36907	1.34692	1.56609	0.437209	0.325581	0.326403	1.62791	1.42326	1.22086	0.540465	1.68893
沈爱玲	女	48	R	p	A	0.434739	0.138674	0.318981	-0.335786	2.37139	7.53911	0.994619	6.9782	0.994619	0	0.193008	0.25924	0.290945	0.309982	0.325787	0.343957	0.36515	0.389142	0.416667	0.446158	0.472404	0.492663	0.511171	0.530035	0.552193	0.573706	0.596247	0.618887	0.630634	0.674112	0.43201	0.443022	1.00853	1.01232	0.83698	0.684432	0.537037	0.518519	0.475787	1.6713	1.56481	1.46285	0.802941	1.78971
彭维军	男	50	R	p	A	0.525003	0.113701	0.216573	-1.05752	3.65414	7.12543	0.994474	6.47008	0.997174	0.134209	0.304522	0.356063	0.395481	0.432584	0.464135	0.492453	0.511157	0.522814	0.538605	0.553074	0.564419	0.57392	0.591679	0.602095	0.616573	0.627405	0.635564	0.648125	0.653569	0.676327	0.391341	0.394897	1.43582	1.5825	1.43912	1.59649	0.369748	0.319328	0.297799	1.27171	1.12605	1.0314	0.389238	1.32778
pwj2	男	51	R	p	A	0.545434	0.110478	0.202551	-0.947916	3.4905	7.0327	0.994848	6.4117	0.997702	0.166667	0.316289	0.384876	0.427391	0.459646	0.492453	0.513277	0.529409	0.541728	0.555352	0.56647	0.578499	0.587109	0.597433	0.616573	0.628585	0.639371	0.659321	0.672141	0.690124	0.718147	0.410486	0.440664	1.39655	1.40486	1.90972	1.93288	0.365741	0.351852	0.316186	1.31944	1.17593	1.05369	0.426269	1.40351
包幼玲	女	65	L	p	A	0.475811	0.135521	0.284821	-0.46273	2.48794	7.35414	0.995364	6.87533	0.995383	0.00084819	0.257315	0.299054	0.318213	0.33777	0.35855	0.384814	0.413454	0.441488	0.472909	0.503217	0.529296	0.548847	0.562152	0.571431	0.580745	0.59384	0.625059	0.646763	0.659755	0.707969	0.401415	0.427976	1.21412	1.21924	1.26478	1.21847	0.404651	0.353488	0.329894	1.13488	0.986047	0.909532	0.37603	1.17658
陈乐	女	27	R	p	N	0.506768	0.142844	0.281873	-0.872996	3.5402	7.17946	0.9951	6.92084	0.9951	0	0.253999	0.325152	0.350068	0.376127	0.408211	0.444142	0.469958	0.494836	0.513097	0.530954	0.552215	0.568673	0.586036	0.600615	0.621014	0.643438	0.6599	0.672423	0.684569	0.833333	0.409979	0.409321	1.27464	1.37033	1.04215	1.00823	0.344186	0.311628	0.294906	1.14419	1.07907	0.974602	0.344143	1.2376
陈乐	女	27	L	p	N	0.5359	0.189475	0.353564	-1.15639	3.23131	6.67113	0.991383	6.42981	0.991383	0	0.129653	0.223648	0.297671	0.358893	0.439781	0.493909	0.521778	0.556155	0.590507	0.619455	0.641047	0.656692	0.672882	0.684698	0.692255	0.693358	0.695098	0.696464	0.698347	0.833333	0.458528	0.503611	1.18989	1.27779	1.17798	1.07372	0.311628	0.288372	0.261288	1.12558	1.05581	0.945691	0.300573	1.19284
wangzhen	女	28	L	p	N	0.454714	0.17602	0.3871	-0.503213	2.30105	7.61619	0.990786	7.14649	0.990786	0	0.139676	0.214417	0.262358	0.296049	0.319411	0.341203	0.370247	0.406878	0.447738	0.484446	0.512411	0.544556	0.568726	0.591043	0.613593	0.63664	0.653294	0.666667	0.675425	0.711026	0.437317	0.468644	1.04654	1.03916	0.9126	0.774727	0.4	0.323256	0.30905	1.19535	1.06047	0.915063	0.376441	1.2686
wangzhen	女	28	R	p	N	0.300561	0.134207	0.446521	-0.612245	2.92828	7.48085	0.986321	6.83153	0.986321	0	0.0146476	0.0677326	0.148886	0.202449	0.246055	0.269872	0.284004	0.294728	0.308791	0.320111	0.328736	0.340728	0.355013	0.371358	0.389966	0.413459	0.432754	0.457311	0.487109	0.629456	0.422956	0.405401	0.679094	0.721999	0.649069	0.520746	0.348837	0.327907	0.301604	1.19535	1.12558	1.03813	0.367507	1.27229
xumeng	男	28	R	p	N	0.484304	0.1208	0.24943	-1.20189	5.44663	7.06658	0.996164	6.76572	0.996164	0	0.29031	0.339827	0.366655	0.394925	0.421101	0.442861	0.458553	0.474074	0.487681	0.502088	0.514255	0.526431	0.540455	0.556487	0.570821	0.586036	0.600096	0.618018	0.640594	0.806038	0.46534	0.510836	1.0515	0.971053	0.870898	0.753132	0.432558	0.372093	0.359432	1.6186	1.53256	1.40524	0.591001	1.76754
周超	男	28	R	p	N	0.393659	0.129484	0.328924	-0.646024	3.21131	7.53021	0.993282	6.79655	0.993282	0	0.182638	0.238311	0.267867	0.290647	0.311328	0.32684	0.34296	0.360252	0.376561	0.393043	0.413579	0.440664	0.465938	0.491117	0.512504	0.527981	0.539221	0.5492	0.565037	0.596247	0.452347	0.483141	0.85216	0.765382	0.842528	0.675919	0.367442	0.339535	0.316758	1.26047	1.2	1.04887	0.40662	1.35444
周超	男	28	L	p	N	0.4095	0.129907	0.317233	-1.06697	4.26303	7.45763	0.993348	6.80918	0.993348	0	0.166667	0.25438	0.294066	0.31976	0.336319	0.35704	0.377898	0.395494	0.416667	0.434963	0.449816	0.463407	0.474965	0.487274	0.501983	0.518155	0.535776	0.55703	0.57793	0.631304	0.438864	0.479885	0.921244	0.860973	0.931985	0.837675	0.474419	0.381395	0.364635	1.29767	1.13953	0.999232	0.48093	1.34945
张优	女	28	R	p	N	0.468016	0.153828	0.328681	-0.813705	3.38837	7.23629	0.9931	6.97664	0.9931	0	0.214726	0.287479	0.31142	0.328815	0.346431	0.375065	0.418304	0.451818	0.482775	0.505446	0.525051	0.540511	0.555542	0.569697	0.58801	0.605648	0.623457	0.638019	0.666667	0.833333	0.396802	0.373836	1.21402	1.4028	1.14755	1.31843	0.413953	0.334884	0.315795	1.33488	1.17907	1.02078	0.429248	1.37882
张优	女	28	L	p	N	0.46459	0.116236	0.25019	-0.146472	2.91376	7.11121	0.996029	6.79724	0.996657	0.0358653	0.29136	0.323968	0.341489	0.35819	0.376127	0.394056	0.417284	0.437107	0.452907	0.468644	0.483959	0.50103	0.513058	0.525267	0.537664	0.559088	0.587927	0.628575	0.666667	0.833333	0.417521	0.430627	1.13444	1.12846	1.16892	1.1961	0.432558	0.413953	0.3755	1.19535	1.11395	1.03874	0.456182	1.26636
战世伟	男	29	R	p	N	0.411807	0.172603	0.419134	-0.681345	2.57923	7.73241	0.98893	7.18225	0.98893	0	0.0721331	0.140354	0.201149	0.269168	0.30542	0.329707	0.358369	0.397349	0.431327	0.457409	0.478765	0.496732	0.511423	0.527306	0.541608	0.560051	0.584004	0.610104	0.641047	0.675614	0.452734	0.495199	0.889338	0.894233	0.947583	0.901811	0.469767	0.409302	0.393588	1.46977	1.38605	1.22113	0.587171	1.55249
战世伟	男	29	L	p	N	0.455685	0.155302	0.34081	-0.864295	3.42679	7.4695	0.992575	7.00182	0.992575	0	0.172306	0.269426	0.291325	0.312796	0.343668	0.382809	0.417821	0.446111	0.47062	0.493506	0.516688	0.531253	0.544217	0.555707	0.569135	0.588736	0.605648	0.623113	0.649265	0.716281	0.459905	0.520289	0.9889	0.934799	1.12471	1.0025	0.409302	0.367442	0.346218	1.43256	1.31628	1.21354	0.504273	1.51743
gaomeng	女	32	L	p	N	0.488082	0.146929	0.301033	-1.09764	3.8954	7.35179	0.993991	6.86614	0.993991	0	0.205887	0.292923	0.328609	0.351365	0.388368	0.432848	0.46728	0.494252	0.515324	0.532023	0.549713	0.562658	0.573745	0.586591	0.597382	0.606613	0.619199	0.640443	0.664725	0.703666	0.44398	0.486153	1.11197	1.10951	1.11858	1.09163	0.325581	0.293023	0.276036	1.17209	1.1186	0.981654	0.330297	1.28255
gaomeng	女	32	R	p	N	0.537373	0.0928054	0.172702	-0.75434	3.38737	7.26014	0.996252	6.44009	0.998311	0.166667	0.36295	0.399089	0.439481	0.469741	0.487737	0.499053	0.508221	0.521872	0.535716	0.55187	0.564504	0.573412	0.584726	0.59605	0.609546	0.62245	0.633101	0.644794	0.660122	0.718932	0.430084	0.475509	1.28136	1.2068	1.15065	1.20854	0.302326	0.265116	0.24636	1.13488	1.02326	0.913225	0.286036	1.19796
Joshua	男	33	R	p	N	0.470552	0.22575	0.479755	-0.733341	2.16916	7.30689	0.984726	6.99689	0.984726	0	0.0200636	0.098971	0.162427	0.236752	0.297507	0.347642	0.421803	0.477523	0.517921	0.555251	0.587572	0.611366	0.631004	0.649603	0.666667	0.681467	0.695205	0.700061	0.703772	0.793357	0.429712	0.473096	1.11543	1.2196	2.03793	2.84645	0.325581	0.288372	0.274538	1.81395	1.64651	1.47739	0.496312	1.90379
Joshua	男	33	L	p	N	0.504449	0.0958065	0.189923	-1.0974	4.27417	7.32392	0.995685	6.44062	0.997952	0.142815	0.312266	0.367759	0.408099	0.441186	0.462539	0.479541	0.491839	0.501073	0.51151	0.52255	0.532458	0.544032	0.553496	0.562152	0.568066	0.57928	0.591679	0.605822	0.628061	0.672882	0.457719	0.520344	1.12053	1.00761	1.12033	0.979873	0.4	0.353488	0.329762	1.22791	1.11163	1.00027	0.406641	1.2796
ganle	男	35	L	p	N	0.504965	0.182377	0.361167	-1.38215	4.29425	7.29842	0.99036	6.82656	0.99036	0	0.0158333	0.255442	0.34296	0.392124	0.437839	0.464812	0.490649	0.510669	0.532227	0.555159	0.57864	0.595296	0.61297	0.629306	0.646763	0.658127	0.668694	0.677217	0.6859	0.713507	0.461532	0.50787	1.11205	1.11471	1.3488	1.25025	0.35814	0.334884	0.315962	1.42791	1.37674	1.26136	0.459297	1.5483
ganle	男	35	R	p	N	0.531717	0.121391	0.2283	-1.0597	3.53706	7.24059	0.99568	6.65445	0.997075	0.084665	0.294728	0.333333	0.38561	0.431327	0.470405	0.501803	0.521081	0.536713	0.553496	0.567406	0.580631	0.592512	0.601088	0.610899	0.621255	0.62927	0.637146	0.654162	0.675745	0.740821	0.432752	0.469046	1.29373	1.35177	1.46804	1.66503	0.451163	0.4	0.371976	1.47442	1.36279	1.21747	0.557058	1.54231
zhangjian	男	35	L	p	N	0.470805	0.16742	0.355603	-1.27713	4.27843	7.1735	0.990988	6.91572	0.990988	0	0.020703	0.251734	0.32684	0.368825	0.402855	0.42643	0.451199	0.47832	0.5	0.515554	0.529572	0.54294	0.553943	0.564016	0.578959	0.598155	0.626438	0.653812	0.668679	0.833333	0.415657	0.45076	1.16385	1.21066	1.3201	1.32503	0.404651	0.376744	0.347848	1.39535	1.26977	1.08919	0.493499	1.50868
覃杰	男	35	R	p	N	0.526979	0.157273	0.298442	-1.46057	5.3117	6.9013	0.994028	6.657	0.994028	0	0.160125	0.329683	0.405546	0.458392	0.483951	0.498031	0.507621	0.520765	0.533394	0.545813	0.557713	0.572497	0.592645	0.616535	0.652411	0.668679	0.687432	0.697386	0.700094	0.833333	0.410498	0.417292	1.36492	1.4642	1.44598	1.42768	0.502326	0.423256	0.385883	1.54884	1.34884	1.21711	0.619405	1.60587
覃杰	男	35	L	p	N	0.585257	0.10004	0.170934	-2.27277	10.2385	6.61119	0.998178	6.16029	0.998231	0.00711574	0.420246	0.478764	0.505553	0.529282	0.548754	0.566381	0.57928	0.589893	0.598278	0.607125	0.6176	0.625302	0.634933	0.646763	0.656471	0.663681	0.668679	0.67495	0.680468	0.726002	0.423356	0.479674	1.50704	1.5486	1.52032	1.42768	0.47907	0.437209	0.40369	1.52558	1.42558	1.28712	0.624857	1.61682
shuixiaolong	男	37	L	p	N	0.596867	0.124389	0.208403	-2.22608	8.60765	6.36696	0.997194	6.11478	0.997205	0.000864143	0.315167	0.458349	0.515791	0.545085	0.562658	0.580708	0.599034	0.613171	0.625886	0.637146	0.646358	0.653176	0.660107	0.669884	0.681028	0.690552	0.69438	0.696926	0.699447	0.833333	0.427756	0.48115	1.53398	1.58322	1.51564	1.5061	0.511628	0.460465	0.414668	1.4186	1.28837	1.10081	0.596625	1.48873
shuixiaolong	男	37	R	p	N	0.583722	0.13499	0.231258	-2.52456	9.35046	6.37227	0.996338	6.12614	0.996372	0.00177841	0.238037	0.439922	0.50719	0.544711	0.57465	0.594494	0.605822	0.616331	0.623948	0.629651	0.636176	0.641242	0.647817	0.653176	0.658257	0.663805	0.668771	0.676227	0.684531	0.833333	0.415488	0.417961	1.63439	1.90404	1.55083	1.62113	0.488372	0.460465	0.417005	1.86512	1.71628	1.46953	0.798204	2.00473
liguichao	男	39	R	p	N	0.525885	0.086017	0.163566	-0.465491	3.81865	6.77372	0.998017	6.38019	0.998567	0.0754636	0.382436	0.415446	0.439781	0.458786	0.474599	0.487401	0.498802	0.50882	0.520044	0.530259	0.54294	0.553963	0.563462	0.572379	0.584726	0.59587	0.606505	0.624254	0.667273	0.833333	0.454387	0.506945	1.19392	1.08731	0.920651	0.795389	0.381395	0.35814	0.321657	1.33488	1.2093	1.12906	0.437101	1.39289
华英汇	男	40	R	p	N	0.440664	0.134487	0.305191	-0.84794	3.77013	7.18564	0.994407	6.92582	0.994407	0	0.176227	0.286428	0.320748	0.344085	0.362086	0.378898	0.394003	0.408656	0.431726	0.459693	0.481977	0.499012	0.514208	0.527927	0.541608	0.55703	0.571148	0.597354	0.628047	0.833333	0.402403	0.391256	1.12152	1.27121	1.24777	1.39631	0.539535	0.44186	0.417654	1.44186	1.23488	1.07941	0.614797	1.51179
华英汇	男	40	L	p	N	0.410751	0.150427	0.366223	-0.7841	3.08697	7.51425	0.991591	7.05954	0.991591	0	0.0991241	0.196734	0.251183	0.295148	0.319777	0.339827	0.363806	0.393066	0.4217	0.446513	0.467542	0.484788	0.5	0.511777	0.524081	0.535389	0.556317	0.577024	0.597832	0.72581	0.436494	0.463463	0.928297	0.944791	0.864128	0.821188	0.516279	0.427907	0.398009	1.35349	1.1186	1.05577	0.534408	1.37328
黄自强	男	40	R	p	N	0.4143	0.164939	0.398114	-0.456751	2.60859	7.50143	0.990401	7.24549	0.990401	0	0.10403	0.185185	0.235016	0.281098	0.305116	0.326362	0.349938	0.379726	0.409632	0.436485	0.458553	0.478919	0.5	0.524856	0.545278	0.567632	0.585886	0.603925	0.660787	0.833333	0.425234	0.46722	0.970154	0.909997	1.06478	0.996336	0.427907	0.4	0.363609	1.34419	1.22558	1.13147	0.496723	1.40532
黄自强	男	40	L	p	N	0.580678	0.0934915	0.161004	-1.07369	4.0336	6.94366	0.997007	6.2885	0.998562	0.166667	0.391989	0.454749	0.491117	0.509487	0.523572	0.538605	0.558356	0.572187	0.585936	0.598155	0.616954	0.630252	0.641047	0.650507	0.656301	0.662672	0.668679	0.67681	0.688202	0.785363	0.44963	0.536537	1.34098	1.1552	1.91575	2.52138	0.409302	0.344186	0.326209	1.23256	1.13721	1.00698	0.410882	1.3064
陈小婷	女	42	R	p	N	0.592871	0.101899	0.171874	-1.37775	4.83424	6.72706	0.996617	6.17103	0.998375	0.166667	0.37522	0.465688	0.5	0.521391	0.541608	0.560026	0.575852	0.59496	0.608841	0.621014	0.629899	0.640235	0.648667	0.66357	0.675303	0.684569	0.690184	0.693962	0.696926	0.833333	0.396244	0.382732	1.70429	1.8474	1.62805	1.79418	0.432558	0.404651	0.3678	1.49767	1.3907	1.27754	0.560584	1.58295
陈小婷	女	42	L	p	N	0.601323	0.10479	0.174266	-1.23479	3.94813	6.3633	0.996925	5.87549	0.998288	0.141529	0.39415	0.442085	0.475863	0.504303	0.530018	0.569446	0.610025	0.625059	0.633126	0.641047	0.646921	0.652918	0.6599	0.672488	0.687747	0.695797	0.696464	0.697402	0.700094	0.833333	0.412747	0.407805	1.62434	1.80724	1.30199	1.20358	0.381395	0.334884	0.30083	1.28837	1.15349	1.0441	0.402098	1.33705
zhuzhonglin	男	45	R	p	N	0.525309	0.132625	0.25247	-1.56323	6.01509	6.81644	0.995736	6.54168	0.995736	0	0.2926	0.341092	0.395472	0.440664	0.481968	0.503489	0.514857	0.523457	0.532458	0.549977	0.569234	0.584527	0.597433	0.609025	0.621388	0.628612	0.638449	0.649852	0.681726	0.780259	0.421164	0.423554	1.30493	1.40668	1.95481	2.03161	0.330233	0.306977	0.278109	1.55814	1.44884	1.27172	0.439308	1.64895
倪卫祖	男	49	R	p	N	0.486969	0.149169	0.306321	-1.26082	4.40615	7.41223	0.993831	6.9346	0.993831	0	0.184827	0.269872	0.332385	0.381702	0.423822	0.458713	0.479663	0.498952	0.512319	0.525267	0.53527	0.547468	0.560183	0.572985	0.589114	0.600578	0.623173	0.642191	0.666667	0.709693	0.411176	0.444142	1.2229	1.27233	1.18586	1.07419	0.4	0.367442	0.339968	1.49302	1.38837	1.27479	0.514051	1.57968
倪卫祖	男	49	L	p	N	0.469605	0.129696	0.276181	-1.07684	4.22095	7.38016	0.995262	6.84888	0.995262	0	0.229805	0.293692	0.327748	0.368968	0.399351	0.423134	0.446521	0.469297	0.488037	0.503193	0.514788	0.525249	0.534723	0.547468	0.559932	0.572985	0.589643	0.608929	0.63712	0.682221	0.420814	0.447309	1.13572	1.17323	1.24433	1.30725	0.413953	0.35814	0.33251	1.35349	1.17442	1.04369	0.457912	1.41822
孙德弟	男	58	R	p	N	0.503278	0.157461	0.312871	-1.20634	3.99616	7.23912	0.993738	6.95867	0.993738	0	0.163147	0.268954	0.339074	0.388445	0.430669	0.469741	0.493137	0.511777	0.529813	0.546969	0.563025	0.575772	0.588582	0.599124	0.612683	0.628952	0.64837	0.666667	0.689827	0.817174	0.444718	0.485983	1.17158	1.20186	1.29113	1.28937	0.409302	0.348837	0.331544	1.62791	1.42326	1.30996	0.539513	1.66773
孙德弟	男	58	L	p	N	0.603479	0.106088	0.175793	-1.1289	3.44894	6.5814	0.996625	6.03092	0.998323	0.166667	0.382753	0.443098	0.479458	0.50424	0.533394	0.56655	0.592258	0.612278	0.630468	0.647745	0.657784	0.667715	0.67809	0.685099	0.690239	0.694548	0.697162	0.699447	0.701158	0.833333	0.489534	0.582682	1.31694	1.1477	2.03615	2.1751	0.437209	0.295349	0.303302	1.73023	1.17674	1.13151	0.552537	1.88704
[truncated: 7 more columns]

## Sheet: middle
姓名	性别	年龄	检查侧L/R	P/M/D	分组A/N	Hmean	stdV	CoV	Hskew	kurtV	EntropyHis1	EntropyBrt1	EntropyHis2	EntropyBrt2	q0	q0.05	q0.1	0.15	0.2	0.25	0.3	0.35	0.4	0.45	H50	0.55	0.6	0.65	0.7	0.75	0.8	0.85	0.9	0.95	q1	meanROI	medianROI	meanRatio	medianRatio	meanRatio2	medianRatio2	max(Thickness),	median(Vthk)厚度	mean(Vthk)厚度	max(Vlong),	median(Vlong),	mean(Vlong)	areaOri,	Rlong,
李青	男	25	R	m	A	0.428834	0.127547	0.297427	-0.869667	3.54635	7.22322	0.994527	6.7566	0.994527	0	0.178294	0.263097	0.307407	0.327859	0.344799	0.368696	0.395038	0.414249	0.42791	0.451444	0.473081	0.487576	0.503828	0.518709	0.529409	0.539695	0.555352	0.572609	0.594794	0.639371	0.400323	0.398841	1.08444	1.15663	1.2026	1.22443	0.516667	0.472222	0.432835	1.3	1.14444	1.03131	0.569938	1.37564
陈宇	男	27	R	m	A	0.399723	0.158564	0.396684	-0.483056	3.1133	7.29418	0.990615	7.05815	0.990615	0	0.0692337	0.181581	0.253254	0.287954	0.314281	0.335159	0.35471	0.374067	0.392928	0.414042	0.432131	0.451444	0.473081	0.490506	0.505475	0.522814	0.549713	0.584527	0.672141	0.833333	0.427974	0.440664	0.87558	0.835392	0.952978	0.97762	0.712963	0.62963	0.574136	1.38889	1.25926	1.11891	0.806241	1.44704
吴杰	男	28	R	m	A	0.380532	0.105378	0.276923	-0.359911	3.14333	7.14595	0.995693	6.56368	0.995693	0	0.201277	0.259661	0.285052	0.305116	0.316961	0.325888	0.331555	0.338736	0.352924	0.370247	0.390311	0.408321	0.427391	0.446926	0.468898	0.488843	0.505475	0.518297	0.536493	0.640647	0.406713	0.403569	0.908196	0.855982	1.07913	0.933816	0.430556	0.393519	0.36841	1.15741	1.04167	0.937477	0.440394	1.26277
胡寅	男	30	L	m	A	0.340822	0.143486	0.420999	-0.328983	2.50985	7.67885	0.989812	7.12322	0.989812	0	0.0680656	0.139147	0.18612	0.22145	0.250578	0.273086	0.291886	0.309223	0.324127	0.342699	0.364022	0.388408	0.410703	0.430478	0.455438	0.479087	0.501032	0.523517	0.547971	0.675614	0.430061	0.44425	0.743793	0.695293	0.960822	1.0281	0.526807	0.498834	0.450317	1.59907	1.48019	1.36826	0.729663	1.67322
钱永明	男	30	R	m	A	0.456843	0.0903132	0.19769	-0.338015	2.37213	7.49304	0.994864	6.4673	0.998025	0.166667	0.309395	0.335234	0.350615	0.365791	0.383623	0.403046	0.4217	0.43933	0.454287	0.46887	0.482225	0.494721	0.506215	0.51788	0.529547	0.540403	0.551792	0.565809	0.588817	0.650371	0.43911	0.478772	1.06841	0.944034	1.31717	1.32552	0.553488	0.511628	0.470496	1.43256	1.31163	1.18512	0.691725	1.54129
王峥月	男	31	R	m	A	0.407549	0.121578	0.298315	-0.497149	2.81338	7.18972	0.99461	6.68178	0.994739	0.00423999	0.201123	0.267952	0.287954	0.303925	0.316289	0.327553	0.342104	0.368696	0.395586	0.422631	0.440664	0.458698	0.47444	0.496006	0.514857	0.532458	0.543105	0.555352	0.569234	0.67229	0.421524	0.432131	0.961406	0.977088	0.770731	0.746078	0.364146	0.347339	0.330192	1.56303	1.507	1.37774	0.526736	1.71123
王强	男	31	R	m	A	0.396573	0.134217	0.338443	-0.252427	2.93619	7.40256	0.993407	6.97769	0.993407	0	0.15691	0.235531	0.274459	0.30011	0.314281	0.329558	0.341092	0.35471	0.373028	0.394804	0.408321	0.427391	0.451444	0.47444	0.496325	0.520621	0.545669	0.572609	0.612825	0.707122	0.453917	0.481968	0.855155	0.780327	1.3444	1.33534	0.483333	0.461111	0.415031	1.45	1.325	1.25827	0.61787	1.52733
孙磊	男	32	L	m	A	0.387409	0.115684	0.29861	-0.856552	3.43533	7.1973	0.994633	6.66741	0.994633	0	0.144352	0.22282	0.282525	0.309876	0.325888	0.338254	0.35471	0.372505	0.387206	0.403569	0.421501	0.43546	0.450897	0.464135	0.476543	0.490506	0.505403	0.517281	0.535865	0.608536	0.435647	0.458553	0.87045	0.822762	0.739237	0.654537	0.511111	0.483333	0.42784	1.48333	1.32222	1.22912	0.645278	1.53868
张奚	女	32	R	m	A	0.445437	0.151505	0.340128	-0.0730186	2.33013	7.16699	0.993318	6.89342	0.993868	0.0170447	0.190124	0.240339	0.286768	0.317632	0.336913	0.35679	0.376847	0.399289	0.422631	0.445369	0.464135	0.486153	0.501712	0.523457	0.549977	0.591679	0.640115	0.679764	0.690857	0.833333	0.467024	0.498072	0.943703	0.860728	1.00773	0.86098	0.616667	0.547222	0.51049	1.53889	1.35278	1.18589	0.819938	1.68297
邢天浩	男	32	R	m	A	0.385988	0.172762	0.447584	-0.305009	2.11958	7.66397	0.989217	7.31351	0.989217	0	0.0805825	0.151243	0.185436	0.212731	0.248349	0.286021	0.317174	0.338068	0.36456	0.401607	0.437566	0.469513	0.493088	0.512411	0.529547	0.549441	0.569402	0.598155	0.629848	0.780259	0.458965	0.5	0.750947	0.695772	0.862189	0.798853	0.911628	0.893023	0.806464	1.6186	1.53023	1.43459	1.31665	1.71901
高彩红	女	32	L	m	A	0.405999	0.096695	0.238166	-0.517402	3.68941	7.23562	0.996823	6.53302	0.996823	0	0.2568	0.293956	0.314667	0.326796	0.338101	0.350615	0.362086	0.37624	0.389191	0.402165	0.418517	0.437938	0.455272	0.47109	0.486348	0.5	0.513665	0.529722	0.547617	0.609856	0.448312	0.478165	0.89024	0.788787	0.909722	0.820702	0.483721	0.423256	0.385007	1.25581	1.12558	1.0047	0.491877	1.30887
邓可爱	男	33	R	m	A	0.536372	0.173796	0.324021	-1.38608	4.0613	6.64087	0.99296	6.38699	0.99296	0	0.147498	0.256669	0.337008	0.403222	0.480468	0.517281	0.539695	0.561374	0.586036	0.606148	0.619682	0.629147	0.639371	0.649852	0.66304	0.67984	0.690124	0.690124	0.691186	0.780259	0.447182	0.490506	1.26276	1.34915	1.53945	2.0085	0.521008	0.462185	0.422477	1.65266	1.40616	1.28737	0.709868	1.71267
钱连义	男	33	L	m	A	0.408846	0.225682	0.551996	-0.320308	1.90788	7.10303	0.981701	6.87747	0.981701	0	0.00547462	0.0363688	0.134847	0.195032	0.241536	0.282525	0.314281	0.353571	0.384876	0.416667	0.45626	0.5	0.545067	0.592196	0.638585	0.664659	0.686828	0.690124	0.690803	0.833333	0.468144	0.505403	0.80094	0.773603	0.696549	0.60937	0.887052	0.815427	0.763783	2.01653	1.85675	1.68235	1.55266	2.1546
丁晓光	男	33	L	m	A	0.47882	0.0968312	0.202229	-0.926078	3.51674	7.24641	0.996151	6.47743	0.99771	0.10163	0.280386	0.335325	0.374359	0.407301	0.433101	0.447703	0.461395	0.474599	0.485116	0.497847	0.507222	0.517711	0.529547	0.541608	0.553925	0.561789	0.571541	0.582021	0.60189	0.684378	0.446158	0.490578	1.08789	1.02469	0.896094	0.74677	0.423256	0.376744	0.338196	1.22326	1.08372	0.982406	0.420984	1.25935
潘明骏	男	34	R	m	A	0.429429	0.113567	0.264461	0.260475	2.92811	7.00217	0.994957	6.67748	0.996363	0.0625683	0.243533	0.301218	0.32357	0.33928	0.349493	0.359353	0.371358	0.387206	0.40504	0.421632	0.440405	0.457299	0.475144	0.487862	0.5	0.518032	0.535716	0.572024	0.658321	0.797971	0.443933	0.475144	0.95528	0.819548	0.809684	0.656942	0.498599	0.459384	0.425378	1.34454	1.22689	1.12051	0.586713	1.44626
王胜	男	34	L	m	A	0.473963	0.105645	0.222897	-0.630527	2.7836	6.89737	0.995655	6.50859	0.997215	0.0881681	0.293071	0.327859	0.344799	0.368696	0.395038	0.416667	0.440664	0.464135	0.488843	0.50185	0.517045	0.525926	0.535865	0.54674	0.555352	0.563155	0.57392	0.591679	0.612825	0.806902	0.428536	0.468458	1.12776	1.11121	0.843999	0.773395	0.42577	0.397759	0.366087	1.40056	1.29972	1.20601	0.522656	1.47885
季骆阳	男	35	R	m	A	0.413182	0.164352	0.397771	-0.457404	2.51028	7.31384	0.990497	7.08031	0.990497	0	0.107969	0.190279	0.235531	0.269192	0.29684	0.319871	0.338736	0.369049	0.408321	0.441916	0.470924	0.496832	0.515953	0.529409	0.540262	0.555352	0.572609	0.5961	0.668749	0.823839	0.43321	0.459738	0.939547	0.94334	0.849066	0.782789	0.470862	0.398601	0.378635	1.34266	1.20979	1.0851	0.518211	1.42073
吴建生	男	37	L	m	A	0.395004	0.222674	0.563726	-0.324371	1.8802	7.36922	0.978641	7.1295	0.978641	0	0.00547462	0.0411111	0.0938021	0.157337	0.234924	0.287954	0.321371	0.344799	0.370247	0.399289	0.432541	0.49213	0.541447	0.578499	0.602095	0.629147	0.653915	0.674012	0.68746	0.833333	0.493694	0.56647	0.773708	0.667583	0.657605	0.596927	0.45	0.416667	0.38224	1.35	1.26111	1.14837	0.525679	1.41976
李欣	男	38	L	m	A	0.503644	0.128545	0.255231	-0.815952	3.04067	7.36969	0.995475	6.82441	0.996441	0.0517025	0.245573	0.293712	0.348217	0.3968	0.436925	0.466694	0.488037	0.505736	0.521251	0.531181	0.543639	0.555462	0.568066	0.582663	0.595838	0.610694	0.626264	0.64181	0.679483	0.726662	0.427731	0.471856	1.24473	1.28037	1.30487	1.38137	0.530233	0.474419	0.436522	1.47442	1.35349	1.21626	0.652526	1.52884
李贵超	男	39	R	m	A	0.437682	0.153483	0.350673	-0.508141	2.26311	7.52449	0.993288	7.12447	0.99337	0.00235593	0.157404	0.197695	0.247833	0.29376	0.319681	0.346702	0.388029	0.426862	0.450455	0.473834	0.493922	0.508101	0.522726	0.541268	0.561527	0.582075	0.598155	0.6176	0.638078	0.757651	0.412358	0.431135	1.08881	1.17217	1.2564	1.4454	0.523148	0.486111	0.45906	1.82407	1.75	1.56082	0.847951	1.98793
陈晓波	男	41	L	m	A	0.362734	0.0821272	0.226412	0.230211	3.19671	6.93074	0.996021	6.27587	0.997318	0.0630247	0.235531	0.268761	0.287147	0.301792	0.311358	0.321371	0.329452	0.333333	0.340342	0.349384	0.359885	0.37582	0.390311	0.398841	0.414249	0.432131	0.452717	0.476543	0.513277	0.666667	0.449953	0.498125	0.780197	0.615824	0.59318	0.521539	0.455556	0.433333	0.391905	1.35556	1.23333	1.16767	0.540988	1.42932
孟淑燕	女	41	L	m	A	0.385465	0.143405	0.37203	-0.508212	2.68811	7.64193	0.991573	7.03545	0.991622	0.000858759	0.12308	0.200938	0.23078	0.266285	0.291816	0.312796	0.329707	0.348726	0.371074	0.394925	0.41539	0.441845	0.469741	0.49146	0.506215	0.521081	0.540455	0.562658	0.585438	0.655121	0.461389	0.503909	0.805841	0.701236	0.713031	0.601089	0.44186	0.418605	0.391087	1.16279	1.11395	1.03149	0.462001	1.25871
李强	男	41	L	m	A	0.437243	0.141297	0.323156	-0.334645	2.39406	7.5583	0.994422	7.08373	0.994449	0.000940823	0.204473	0.243725	0.273234	0.307017	0.328931	0.349718	0.373836	0.399351	0.426997	0.455272	0.480128	0.501025	0.518297	0.532969	0.552249	0.568175	0.584024	0.607125	0.64181	0.71448	0.456773	0.511777	0.942991	0.829243	1.00549	0.811618	0.669767	0.627907	0.57781	1.27442	1.2093	1.10059	0.745008	1.35597
王来	女	42	R	m	A	0.262384	0.138783	0.528932	-0.0882995	2.61784	7.45288	0.981908	6.83947	0.981908	0	0.00851923	0.0467401	0.102095	0.135963	0.162992	0.188043	0.216644	0.246421	0.266026	0.284777	0.301792	0.314281	0.325888	0.337008	0.347802	0.361017	0.38398	0.42296	0.5	0.61829	0.423392	0.430191	0.584182	0.601425	0.640635	0.665733	0.444444	0.4	0.368636	1.31111	1.17222	1.03778	0.492685	1.37675
缪利民	男	42	R	m	A	0.510346	0.110516	0.21655	-1.14523	6.00064	6.81921	0.996817	6.58301	0.996817	0	0.337008	0.381208	0.4039	0.427676	0.446926	0.468898	0.48494	0.497915	0.509627	0.522814	0.534874	0.548556	0.561374	0.572207	0.582108	0.594127	0.612825	0.645586	0.674012	0.833333	0.453456	0.5	1.14835	1.0589	1.72254	1.80587	0.472574	0.438819	0.397235	1.39241	1.24895	1.13295	0.568285	1.4609
戚伟刚	男	42	R	m	A	0.310905	0.118232	0.380285	-0.276045	3.03401	7.6131	0.991388	6.84717	0.991388	0	0.100472	0.163061	0.192762	0.219391	0.241526	0.259179	0.273938	0.285898	0.298603	0.312681	0.324215	0.338068	0.355155	0.372794	0.388825	0.410685	0.43353	0.466436	0.508007	0.579452	0.396365	0.399852	0.748573	0.687611	0.698174	0.63499	0.497674	0.45814	0.422376	1.10233	1.01395	0.927886	0.47271	1.16148
李洪伟	男	42	R	m	A	0.481909	0.149811	0.31087	-0.483455	2.62008	7.50331	0.994498	7.02134	0.994498	0	0.242936	0.29066	0.313894	0.330492	0.35471	0.388368	0.420635	0.45626	0.482189	0.503828	0.522206	0.541061	0.563462	0.588736	0.612278	0.629031	0.643852	0.667676	0.694594	0.710857	0.489507	0.540403	0.981039	0.91096	1.13972	0.943614	0.451163	0.390698	0.372205	1.34884	1.26977	1.07369	0.49934	1.43808
李永辉	男	43	R	m	A	0.407238	0.107061	0.262897	0.286388	2.22935	7.59335	0.990021	6.69786	0.996639	0.166667	0.248866	0.273086	0.294728	0.310594	0.322609	0.332399	0.343028	0.357825	0.376753	0.39774	0.417892	0.436213	0.452932	0.473081	0.490167	0.507984	0.528049	0.553925	0.596602	0.697295	0.400199	0.373057	1.0248	1.11155	1.04181	1.10757	0.534884	0.446512	0.42346	1.57209	1.41395	1.24305	0.679005	1.67041
严峰	男	48	L	m	A	0.440905	0.152893	0.346771	-0.0825412	2.26646	7.3182	0.993592	7.01657	0.993592	0	0.190803	0.260453	0.293071	0.314281	0.32928	0.338736	0.35679	0.377727	0.403569	0.427676	0.451444	0.480682	0.511793	0.540262	0.572609	0.605465	0.633868	0.659417	0.681726	0.788605	0.383264	0.37582	1.19553	1.19512	1.19441	1.18412	0.823529	0.777778	0.694901	1.60784	1.47712	1.36071	1.13238	1.6864
沈爱玲	女	48	R	m	A	0.406806	0.156568	0.384872	-0.0197695	2.2255	7.46568	0.992349	7.20704	0.992349	0	0.159329	0.207219	0.246757	0.280259	0.300491	0.315392	0.329479	0.344198	0.363376	0.385615	0.410703	0.439881	0.475481	0.509213	0.540588	0.574084	0.601131	0.627428	0.655479	0.833333	0.423705	0.411119	0.945796	0.896563	0.902512	0.854557	0.50463	0.476852	0.446061	1.85648	1.76389	1.62358	0.83672	1.9838
彭维军	男	50	R	m	A	0.532329	0.0993783	0.186686	-1.02294	3.93868	6.85545	0.99737	6.29627	0.998005	0.0630247	0.352771	0.386407	0.416667	0.445369	0.468458	0.491394	0.513277	0.529409	0.543105	0.558273	0.572609	0.584527	0.595401	0.601159	0.607331	0.61829	0.628612	0.639371	0.649852	0.676001	0.411748	0.436339	1.41327	1.45978	1.21895	1.28101	0.403361	0.369748	0.331641	1.47339	1.2577	1.13773	0.52523	1.63017
pwj2	男	51	R	m	A	0.508372	0.091734	0.180447	-1.42234	4.76634	6.68703	0.996761	6.05351	0.998125	0.110472	0.313462	0.358777	0.408099	0.446127	0.476543	0.5	0.515481	0.525926	0.535188	0.540262	0.548556	0.553074	0.556154	0.561957	0.56647	0.572024	0.57721	0.584527	0.601159	0.699282	0.410034	0.422631	1.29281	1.40373	1.19544	1.13874	0.356481	0.328704	0.300715	1.41667	1.27778	1.15266	0.433985	1.482
包幼玲	女	65	L	m	A	0.432562	0.138642	0.320514	-0.235307	2.86591	7.291	0.994299	7.03263	0.994299	0	0.201337	0.263948	0.300786	0.323353	0.340245	0.35486	0.371358	0.391159	0.412461	0.433257	0.448489	0.466717	0.486449	0.506169	0.530259	0.567569	0.590397	0.628061	0.661388	0.833333	0.413937	0.425469	1.05329	1.02597	1.23078	1.24459	0.525581	0.455814	0.413446	1.26977	1.10465	1.00392	0.534776	1.29477
陈乐	女	27	R	m	N	0.52054	0.158147	0.303813	-1.24942	3.78915	7.01917	0.994032	6.77153	0.994032	0	0.185487	0.267524	0.34169	0.39181	0.440824	0.483728	0.512342	0.53668	0.560678	0.580708	0.596795	0.60825	0.62211	0.632599	0.642354	0.650853	0.654874	0.660845	0.672329	0.833333	0.41862	0.402198	1.29228	1.53955	0.899746	0.871062	0.390698	0.311628	0.31017	1.23721	1.11163	0.94335	0.392428	1.34055
陈乐	女	27	L	m	N	0.411454	0.195692	0.475611	-0.359973	2.2206	7.59692	0.985948	7.33878	0.985948	0	0.0351971	0.116209	0.176063	0.231089	0.285894	0.316743	0.339323	0.36913	0.401399	0.438043	0.463741	0.48522	0.507575	0.53204	0.558842	0.60163	0.644794	0.672447	0.695797	0.833333	0.528974	0.613593	0.74411	0.677973	0.738285	0.691544	0.376744	0.306977	0.295762	1.56279	1.46047	1.24799	0.472277	1.63218
wangzhen	女	28	L	m	N	0.371778	0.111864	0.300889	-0.498762	3.74762	7.3871	0.994628	6.7757	0.994628	0	0.167595	0.220528	0.270633	0.299748	0.314915	0.326968	0.340053	0.351758	0.363161	0.377073	0.389966	0.40252	0.416667	0.429764	0.443171	0.460829	0.480907	0.503067	0.546706	0.643329	0.437258	0.42535	0.825293	0.809274	0.801358	0.606287	0.395349	0.376744	0.340702	1.23721	1.15814	1.06755	0.42888	1.30289
wangzhen	女	28	R	m	N	0.263615	0.148307	0.562589	-0.116865	2.23384	7.75724	0.980002	6.97901	0.980002	0	0.00860612	0.0235591	0.0709898	0.12364	0.166667	0.192822	0.214284	0.234029	0.253281	0.27782	0.297891	0.312397	0.326968	0.344495	0.36515	0.386006	0.419085	0.470623	0.510687	0.571541	0.45021	0.446158	0.535138	0.542657	0.448783	0.41673	0.413953	0.395349	0.357407	1.26512	1.1814	1.08152	0.45973	1.34119
xumeng	男	28	R	m	N	0.407753	0.119506	0.293086	-0.419358	2.47712	7.39352	0.995332	6.81443	0.995332	0	0.202186	0.243725	0.273234	0.297271	0.313938	0.332373	0.353433	0.377952	0.407301	0.434242	0.451178	0.46728	0.481445	0.493181	0.503361	0.512553	0.525401	0.542031	0.570236	0.663703	0.404174	0.403744	1.0109	1.10213	1.07717	1.15756	0.446512	0.386047	0.363727	1.54419	1.42326	1.24708	0.570557	1.61174
周超	男	28	R	m	N	0.355662	0.118543	0.333302	-0.249412	3.21092	7.52103	0.993675	6.82752	0.993675	0	0.151209	0.209348	0.250531	0.276575	0.289754	0.302465	0.31388	0.323339	0.333333	0.346431	0.361415	0.379726	0.394925	0.410073	0.431567	0.460516	0.493038	0.519462	0.557225	0.608744	0.445614	0.432754	0.764044	0.723359	0.635848	0.521521	0.44186	0.404651	0.389116	1.36279	1.31395	1.15405	0.538453	1.49755
周超	男	28	L	m	N	0.38648	0.122225	0.316252	-0.599923	2.80438	7.22668	0.994137	6.82594	0.994137	0	0.157234	0.206083	0.254724	0.288241	0.309954	0.327017	0.344224	0.363813	0.380073	0.398121	0.417892	0.439481	0.459987	0.477141	0.488991	0.5	0.511963	0.526287	0.551301	0.75	0.441384	0.45015	0.856253	0.847533	0.81069	0.633571	0.409302	0.386047	0.3513	1.26047	1.16744	1.05955	0.450319	1.33745
张优	女	28	R	m	N	0.528363	0.0843978	0.159734	-0.886177	5.58425	6.9345	0.998117	6.30308	0.998612	0.0690407	0.3894	0.431625	0.458392	0.474074	0.485855	0.497684	0.506962	0.516416	0.52506	0.532615	0.541608	0.55097	0.560183	0.567632	0.579339	0.591169	0.60163	0.62331	0.667691	0.706216	0.409112	0.405422	1.37056	1.49224	1.4798	1.67455	0.474419	0.402326	0.375771	1.30698	1.12791	0.978393	0.498972	1.38653
张优	女	28	L	m	N	0.362871	0.134571	0.370851	-0.59058	3.27591	7.21521	0.991478	6.95705	0.991478	0	0.0820916	0.18612	0.240428	0.272814	0.294217	0.312112	0.324334	0.337083	0.35486	0.370519	0.384051	0.400464	0.418468	0.437938	0.45626	0.48662	0.513462	0.529999	0.552173	0.833333	0.431872	0.4367	0.810668	0.788376	0.907767	0.872384	0.432558	0.395349	0.363768	1.45581	1.31163	1.20782	0.546631	1.55835
战世伟	男	29	R	m	N	0.383121	0.106851	0.278896	-0.528222	3.92584	7.28093	0.995563	6.73093	0.995563	0	0.190533	0.254375	0.289886	0.306669	0.320236	0.334301	0.350858	0.36633	0.379808	0.389748	0.401	0.412839	0.423933	0.437938	0.45154	0.468183	0.490516	0.512504	0.545278	0.676161	0.423482	0.438409	0.885736	0.830983	1.13071	1.14228	0.493023	0.409302	0.385123	1.37674	1.2186	1.07724	0.538432	1.41349
战世伟	男	29	L	m	N	0.40897	0.148093	0.362112	-0.707122	3.35404	7.32966	0.991933	7.07286	0.991933	0	0.113494	0.20069	0.270817	0.297971	0.321333	0.346702	0.373057	0.395038	0.414865	0.43459	0.451624	0.466572	0.4829	0.5	0.513097	0.529168	0.547084	0.569903	0.607264	0.833333	0.43536	0.475699	0.922967	0.860367	1.27353	1.48994	0.493023	0.446512	0.420994	1.49302	1.41395	1.27229	0.647377	1.62045
gaomeng	女	32	L	m	N	0.535685	0.14794	0.27617	-1.61799	5.52089	7.09337	0.994712	6.59528	0.994712	0	0.232622	0.344631	0.39489	0.430809	0.460829	0.506038	0.532264	0.553943	0.571554	0.59296	0.60773	0.619324	0.625059	0.630252	0.63664	0.646243	0.657993	0.664997	0.677254	0.699929	0.408765	0.420907	1.36972	1.5021	1.41083	1.40415	0.404651	0.353488	0.32505	1.17674	1.06047	0.946987	0.389508	1.21096
gaomeng	女	32	R	m	N	0.475389	0.106822	0.224705	-0.131323	2.2769	7.17807	0.995385	6.67214	0.997352	0.111551	0.31142	0.327132	0.343028	0.361826	0.389612	0.412992	0.433481	0.450743	0.467305	0.484073	0.501032	0.516529	0.530259	0.545299	0.559686	0.570037	0.584726	0.603565	0.645053	0.810519	0.417369	0.412992	1.16728	1.26757	0.886736	0.726109	0.381395	0.35814	0.327182	1.27442	1.18837	1.0603	0.425982	1.35206
Joshua	男	33	R	m	N	0.484903	0.155174	0.320011	-0.806355	2.7156	7.33257	0.992806	7.01949	0.993881	0.0326154	0.167716	0.250052	0.299704	0.33429	0.372817	0.415442	0.461395	0.495887	0.516952	0.532528	0.547842	0.559996	0.571431	0.590397	0.606484	0.622927	0.636407	0.65265	0.667699	0.833333	0.442089	0.461106	1.11244	1.19724	0.971695	0.889121	0.35814	0.313953	0.290242	1.36279	1.23023	1.11348	0.405646	1.42109
Joshua	男	33	L	m	N	0.513546	0.106276	0.206945	-0.621259	3.30664	7.07214	0.99615	6.6243	0.997678	0.107253	0.316853	0.359112	0.394137	0.428133	0.453135	0.478624	0.496034	0.507984	0.519438	0.528294	0.538296	0.548847	0.559336	0.567632	0.579892	0.592173	0.611415	0.654006	0.678459	0.833333	0.422781	0.451818	1.26307	1.26049	1.78742	2.26534	0.386047	0.353488	0.333201	1.4093	1.34186	1.1941	0.477707	1.51036
ganle	男	35	L	m	N	0.336045	0.0980786	0.291862	-0.279036	2.9824	7.41011	0.995263	6.62574	0.995263	0	0.174355	0.207365	0.232133	0.251114	0.271523	0.29027	0.303873	0.314194	0.323732	0.334225	0.346336	0.359165	0.376438	0.394753	0.410544	0.426588	0.443022	0.461395	0.490373	0.575198	0.449248	0.443367	0.711149	0.657794	0.610249	0.512633	0.460465	0.413953	0.369309	1.29302	1.13488	1.0387	0.485279	1.31545
ganle	男	35	R	m	N	0.370587	0.163001	0.439844	-0.0613852	2.68463	7.43241	0.988652	7.17229	0.988652	0	0.0621951	0.174166	0.216133	0.240859	0.265657	0.287028	0.304648	0.321124	0.338397	0.359025	0.383887	0.411701	0.43933	0.467064	0.493315	0.515389	0.537361	0.571979	0.679157	0.833333	0.448491	0.466436	0.794777	0.670908	0.69464	0.538537	0.469767	0.413953	0.384479	1.26977	1.08837	1.00926	0.504597	1.36907
zhangjian	男	35	L	m	N	0.439319	0.148959	0.339067	-0.383259	2.54652	7.35246	0.993479	7.09365	0.993511	0.000947289	0.174407	0.248304	0.285363	0.304946	0.321867	0.34296	0.370291	0.405056	0.434242	0.46473	0.490988	0.509494	0.523457	0.535549	0.550457	0.568726	0.588318	0.614875	0.67225	0.833333	0.460336	0.508409	0.943613	0.866722	0.866676	0.697095	0.474419	0.44186	0.396121	1.25581	1.11628	1.02972	0.50516	1.30924
覃杰	男	35	R	m	N	0.417907	0.140178	0.33543	-0.513511	2.51702	7.54786	0.993738	6.99696	0.993738	0	0.166667	0.220743	0.270895	0.29896	0.318666	0.335234	0.354568	0.378857	0.403041	0.434963	0.464167	0.490855	0.508409	0.523161	0.536966	0.552249	0.567632	0.583333	0.600615	0.678133	0.410506	0.409379	1.0225	1.07098	1.29564	1.26801	0.460465	0.404651	0.378666	1.8186	1.65116	1.39965	0.698886	1.91231
覃杰	男	35	L	m	N	0.472827	0.160659	0.339785	-0.361184	2.09664	7.41589	0.993333	7.13343	0.993803	0.0155539	0.174848	0.243099	0.294217	0.322609	0.350433	0.377894	0.404274	0.430445	0.460546	0.486348	0.510925	0.538929	0.573138	0.598977	0.619199	0.63712	0.653801	0.673386	0.691523	0.833333	0.442531	0.46887	1.08521	1.05283	0.930337	0.802985	0.469767	0.418605	0.382616	1.67907	1.55349	1.36977	0.65205	1.7492
shuixiaolong	男	37	L	m	N	0.532341	0.137438	0.258176	-0.840214	2.62278	7.29468	0.992444	6.76561	0.99634	0.147142	0.262781	0.310439	0.343957	0.384469	0.446111	0.49688	0.523926	0.545118	0.562451	0.576581	0.588105	0.598155	0.608961	0.621939	0.634876	0.651978	0.666667	0.681768	0.696464	0.833333	0.440601	0.480409	1.2725	1.36013	1.15509	1.13394	0.502326	0.432558	0.388521	1.51628	1.28837	1.17636	0.597815	1.53535
shuixiaolong	男	37	R	m	N	0.407505	0.129141	0.316906	-0.271006	2.57167	7.54063	0.994619	6.95314	0.994619	0	0.194473	0.247644	0.280125	0.296543	0.310166	0.323273	0.341514	0.365051	0.388825	0.412812	0.434708	0.459219	0.479945	0.496172	0.509078	0.522445	0.544032	0.575112	0.610845	0.661221	0.428329	0.45154	0.937807	0.886301	1.4693	1.32319	0.47907	0.386047	0.370213	1.68372	1.30233	1.19208	0.673012	1.88824
liguichao	男	39	R	m	N	0.443777	0.144453	0.325507	-0.60028	2.30116	7.60525	0.991221	6.97331	0.994192	0.0738389	0.165849	0.212159	0.267406	0.308155	0.333333	0.365871	0.40497	0.437938	0.461533	0.483957	0.500974	0.511869	0.525267	0.541947	0.559996	0.578959	0.594002	0.60906	0.628061	0.713878	0.412556	0.431135	1.10048	1.18858	1.34597	1.54185	0.451163	0.390698	0.366243	1.7814	1.6	1.39179	0.662434	1.87359
华英汇	男	40	R	m	N	0.37533	0.141772	0.377727	-0.690508	3.00803	7.21483	0.991065	6.95734	0.991065	0	0.0748853	0.182948	0.23642	0.26784	0.291816	0.308791	0.32048	0.342705	0.371231	0.39837	0.419687	0.442259	0.459646	0.475509	0.490373	0.503253	0.514915	0.530035	0.562152	0.833333	0.455876	0.488207	0.784882	0.713659	0.693542	0.620886	0.502326	0.474419	0.426626	1.27907	1.16279	1.04282	0.545679	1.3378
华英汇	男	40	L	m	N	0.464523	0.111468	0.239962	-0.662309	3.13674	7.27455	0.99685	6.69757	0.99685	0	0.273974	0.308144	0.329972	0.357296	0.385631	0.412891	0.434242	0.452907	0.471508	0.488123	0.500995	0.510852	0.520765	0.530736	0.548145	0.566052	0.58192	0.598935	0.618809	0.66236	0.460861	0.5	1.01001	0.954115	0.862809	0.732184	0.483721	0.451163	0.395276	1.47442	1.35349	1.20869	0.579059	1.50897
黄自强	男	40	R	m	N	0.480893	0.144109	0.29967	-0.42916	2.54382	7.24961	0.993801	6.91282	0.99517	0.0510065	0.226258	0.288605	0.313092	0.334321	0.366898	0.403744	0.436394	0.468482	0.491142	0.506962	0.523161	0.538911	0.553925	0.567406	0.582021	0.59663	0.622312	0.682221	0.699846	0.833333	0.431956	0.462539	1.14383	1.14738	0.997786	0.956469	0.455814	0.413953	0.369404	1.69302	1.49767	1.3603	0.624986	1.70262
黄自强	男	40	L	m	N	0.60312	0.105032	0.174148	-1.13199	3.54994	6.27144	0.998224	5.9914	0.998376	0.0248563	0.380073	0.448519	0.491236	0.511963	0.530018	0.556563	0.592305	0.617268	0.629899	0.641174	0.652314	0.662614	0.67373	0.684963	0.693358	0.696464	0.698101	0.69995	0.703204	0.833333	0.458735	0.530259	1.40777	1.32651	1.32801	1.21052	0.488372	0.404651	0.375848	1.63721	1.42326	1.26275	0.624727	1.67432
陈小婷	女	42	R	m	N	0.482382	0.123198	0.255395	-0.100113	1.96999	7.4499	0.99523	6.78783	0.996685	0.0773248	0.299748	0.32145	0.338036	0.356988	0.37582	0.39685	0.41915	0.444178	0.466606	0.485116	0.50104	0.517649	0.54312	0.571783	0.596247	0.616557	0.629848	0.649442	0.667699	0.696926	0.375014	0.361415	1.39544	1.45535	1.2233	1.26099	0.493023	0.439535	0.394867	1.48837	1.32791	1.21077	0.609497	1.56226
陈小婷	女	42	L	m	N	0.52497	0.114431	0.217977	-0.603404	3.49771	6.99367	0.996916	6.61366	0.997452	0.0440083	0.336175	0.371828	0.40375	0.43353	0.455444	0.475687	0.493226	0.508221	0.524476	0.536478	0.547858	0.557674	0.567756	0.580549	0.603966	0.625922	0.65265	0.688517	0.696464	0.812253	0.467919	0.5	1.16611	1.12604	1.0379	0.962613	0.455814	0.413953	0.379555	1.47907	1.38837	1.23949	0.573629	1.57916
zhuzhonglin	男	45	R	m	N	0.444669	0.110492	0.248482	-0.727348	2.82078	7.23832	0.994443	6.59603	0.996617	0.0891465	0.239276	0.286424	0.314252	0.337008	0.364037	0.393635	0.416667	0.440904	0.459738	0.475144	0.486153	0.496325	0.507547	0.517281	0.529409	0.543105	0.555352	0.56647	0.582108	0.689216	0.426835	0.457299	1.05293	1.06685	1.07713	1	0.446512	0.393023	0.371259	1.47907	1.37209	1.23045	0.556019	1.55398
倪卫祖	男	49	R	m	N	0.478281	0.135839	0.284015	-0.685015	3.39225	7.46205	0.995296	6.99161	0.995296	0	0.236964	0.305214	0.336203	0.366269	0.389748	0.411768	0.43353	0.457409	0.479457	0.497315	0.508101	0.523517	0.547812	0.566333	0.586036	0.602924	0.62048	0.642191	0.669643	0.712273	0.385752	0.412106	1.29561	1.29722	1.34454	1.29901	0.423256	0.390698	0.354171	1.3907	1.1907	1.08269	0.500681	1.46508
倪卫祖	男	49	L	m	N	0.485132	0.161451	0.332799	-0.810399	3.1622	7.44003	0.993319	7.08827	0.993349	0.000832816	0.166667	0.272429	0.305776	0.350586	0.389191	0.416667	0.444926	0.467542	0.488911	0.510072	0.530018	0.55473	0.572985	0.595296	0.623596	0.64181	0.657244	0.672882	0.684546	0.780259	0.420059	0.43933	1.19479	1.2333	1.45598	1.53915	0.506977	0.451163	0.413808	1.47442	1.27209	1.12881	0.620876	1.55029
孙德弟	男	58	R	m	N	0.485502	0.156798	0.322959	-0.800515	3.36178	7.18677	0.993798	6.93146	0.993798	0	0.192836	0.282821	0.312796	0.345368	0.385228	0.422709	0.456114	0.479405	0.497896	0.511049	0.52545	0.541788	0.561653	0.583333	0.603565	0.623439	0.64429	0.69171	0.696464	0.833333	0.440974	0.48156	1.14283	1.11031	1.32993	1.26058	0.432558	0.4	0.370645	1.81395	1.70698	1.51278	0.682531	1.93209
孙德弟	男	58	L	m	N	0.502089	0.133321	0.265534	-0.867296	2.86944	7.51805	0.994212	6.80623	0.996149	0.0833333	0.233358	0.293096	0.335147	0.379726	0.4217	0.455968	0.484899	0.50787	0.52506	0.54018	0.555159	0.566571	0.57928	0.590815	0.601374	0.613188	0.631202	0.648955	0.664578	0.685517	0.429031	0.482775	1.24967	1.23772	1.32652	1.52712	0.52093	0.497674	0.446828	1.56744	1.46047	1.3462	0.709767	1.647
[truncated: 7 more columns]

## Sheet: distal
姓名	性别	年龄	检查侧L/R	P/M/D	分组A/N	Hmean	stdV	CoV	Hskew	kurtV	EntropyHis1	EntropyBrt1	EntropyHis2	EntropyBrt2	q0	q0.05	q0.1	0.15	0.2	0.25	0.3	0.35	0.4	0.45	H50	0.55	0.6	0.65	0.7	0.75	0.8	0.85	0.9	0.95	q1	meanROI	medianROI	meanRatio	medianRatio	meanRatio2	medianRatio2	max(Thickness),	median(Vthk)厚度	mean(Vthk)厚度	max(Vlong),	median(Vlong),	mean(Vlong)	areaOri,	Rlong,
李青	男	25	R	d	A	0.38822	0.168843	0.434917	-0.312678	2.52329	7.44957	0.988553	7.16985	0.988553	0	0.0641417	0.158193	0.200094	0.240339	0.282615	0.308477	0.327905	0.346431	0.369826	0.397416	0.422631	0.455906	0.475144	0.496325	0.517045	0.534874	0.556154	0.591679	0.6685	0.790846	0.444957	0.481968	0.845033	0.777929	0.957461	0.901368	0.477778	0.419444	0.404003	1.78333	1.61667	1.4224	0.732654	1.93765
陈宇	男	27	R	d	A	0.409159	0.194246	0.474745	-0.0349058	2.07236	7.10296	0.987399	6.89322	0.987399	0	0.0739199	0.166667	0.212717	0.246421	0.273998	0.29684	0.317632	0.333333	0.352924	0.377727	0.416667	0.455906	0.489135	0.523457	0.587109	0.650926	0.682148	0.690124	0.691186	0.822324	0.436013	0.468266	0.910424	0.758856	0.971773	0.823737	0.490741	0.435185	0.4	1.59259	1.41667	1.1407	0.646305	1.69412
吴杰	男	28	R	d	A	0.531022	0.130775	0.24627	-1.28261	4.702	6.82574	0.996337	6.58662	0.996337	0	0.269198	0.345919	0.398813	0.436339	0.47065	0.492453	0.517045	0.535188	0.5516	0.568258	0.578499	0.589456	0.597433	0.607331	0.619682	0.634209	0.649385	0.674112	0.690124	0.833333	0.508745	0.578499	1.06038	0.95812	1.4139	1.52551	0.439815	0.310185	0.321965	1.5787	1.25231	1.1191	0.527692	1.73891
胡寅	男	30	L	d	A	0.476704	0.214404	0.449764	-0.59899	2.0836	7.10551	0.987765	6.85931	0.987765	0	0.0678004	0.148018	0.204476	0.263051	0.31168	0.34926	0.388193	0.442943	0.5	0.537105	0.56636	0.601893	0.639688	0.66956	0.688057	0.696464	0.69825	0.699549	0.701838	0.833333	0.481117	0.526019	0.988205	1.0288	1.30253	1.54672	0.386946	0.32634	0.326281	2.17716	2.13054	1.85503	0.723165	2.42756
钱永明	男	30	R	d	A	0.440299	0.166003	0.377022	-0.10677	2.14284	7.36756	0.992508	7.12002	0.992508	0	0.172488	0.221444	0.260794	0.291741	0.314319	0.336081	0.361134	0.388777	0.414188	0.435444	0.45772	0.483383	0.509351	0.536322	0.580549	0.633637	0.664624	0.676361	0.6894	0.833333	0.467275	0.521081	0.91097	0.723773	0.882447	0.693314	0.502326	0.437209	0.41812	1.73488	1.66047	1.44986	0.734884	1.87152
王峥月	男	31	R	d	A	0.429485	0.129561	0.301665	-1.19328	4.15999	7.22669	0.993903	6.71205	0.993903	0	0.153424	0.248509	0.302407	0.331483	0.359885	0.391607	0.416667	0.435917	0.456522	0.473081	0.484209	0.492555	0.50185	0.509627	0.516434	0.522814	0.535865	0.558273	0.584527	0.66357	0.414717	0.45626	1.04348	1.05852	1.06369	1.04706	0.341737	0.291317	0.282154	1.78151	1.35294	1.1813	0.517478	1.9832
王强	男	31	R	d	A	0.476973	0.191282	0.401033	-0.701797	2.41302	7.0153	0.989929	6.7667	0.989929	0	0.132413	0.18746	0.22282	0.273998	0.329452	0.398813	0.446187	0.47444	0.5	0.522814	0.538605	0.568258	0.597433	0.618603	0.649876	0.672141	0.68746	0.690124	0.690803	0.833333	0.45368	0.518297	1.06113	1.0104	1.08031	1.03334	0.405556	0.327778	0.320212	2.29444	1.83333	1.56246	0.759877	2.69744
孙磊	男	32	L	d	A	0.408693	0.154949	0.379133	-0.272547	2.82431	7.4658	0.991524	7.06245	0.991524	0	0.150267	0.209154	0.257249	0.287954	0.309876	0.325888	0.344799	0.368438	0.386407	0.411564	0.434044	0.456522	0.480948	0.50185	0.520514	0.539695	0.561374	0.616816	0.678294	0.714766	0.456798	0.498072	0.874961	0.773447	0.840013	0.638096	0.4	0.366667	0.361865	1.99444	1.93056	1.75651	0.735309	2.20807
张奚	女	32	R	d	A	0.386228	0.234176	0.606316	-0.468689	1.75723	7.23573	0.975225	7.01379	0.975225	0	0.00540311	0.0105868	0.0290007	0.0891465	0.166667	0.23869	0.30926	0.365791	0.427676	0.47444	0.507547	0.522814	0.535865	0.555352	0.583333	0.602095	0.62478	0.649852	0.682594	0.833333	0.499256	0.611223	0.716932	0.730075	0.926933	0.885373	0.594444	0.472222	0.455316	1.90556	1.27778	1.21874	0.891019	2.09538
邢天浩	男	32	R	d	A	0.397649	0.201079	0.50567	-0.252044	2.04746	7.60049	0.985447	7.34423	0.985447	0	0.0259859	0.0953435	0.163765	0.208961	0.252241	0.284611	0.313357	0.34296	0.380426	0.416085	0.447688	0.473191	0.495131	0.523206	0.565837	0.606473	0.642782	0.668636	0.691702	0.833333	0.413294	0.412006	0.943262	1.01613	0.910918	0.917364	0.55814	0.465116	0.46799	2.12558	1.8186	1.47597	1.00651	2.38238
高彩红	女	32	L	d	A	0.563086	0.154374	0.274156	-1.07403	3.09403	6.63319	0.993394	6.21747	0.995651	0.0929052	0.240821	0.302425	0.364654	0.434459	0.486136	0.517162	0.541608	0.565302	0.592645	0.619455	0.647379	0.666667	0.683567	0.691158	0.693557	0.696016	0.696926	0.698886	0.700094	0.833333	0.504695	0.579452	1.14955	1.09288	1.09103	1.09189	0.381395	0.35814	0.33115	1.62326	1.52558	1.39601	0.546652	1.72192
邓可爱	男	33	R	d	A	0.537033	0.141711	0.263878	-0.796532	3.10503	6.48674	0.996092	6.1975	0.996092	0	0.30011	0.335159	0.365449	0.403569	0.436339	0.475144	0.50185	0.521036	0.538605	0.554517	0.57288	0.602095	0.632269	0.653569	0.675494	0.688043	0.690124	0.690124	0.691186	0.833333	0.495144	0.555352	1.11676	0.998497	1.55102	1.60303	0.504202	0.431373	0.413973	2.05042	1.57983	1.47721	0.888512	2.25063
钱连义	男	33	L	d	A	0.413857	0.210384	0.508351	-0.239044	2.03689	7.02469	0.984888	6.68896	0.984888	0	0.0125858	0.111585	0.179764	0.233137	0.273998	0.304776	0.325888	0.338736	0.365791	0.403222	0.440904	0.49213	0.522742	0.563155	0.616573	0.674112	0.690124	0.690124	0.690124	0.731703	0.448888	0.507547	0.886429	0.752469	0.842999	0.766298	0.633609	0.556474	0.524155	2.41873	2.19284	1.90325	1.28403	2.61628
丁晓光	男	33	L	d	A	0.363537	0.161558	0.444406	0.403935	2.70316	7.32995	0.98987	7.07134	0.98987	0	0.128061	0.170638	0.209341	0.240283	0.26248	0.279164	0.290939	0.30187	0.313357	0.324988	0.346985	0.375307	0.408432	0.44073	0.474446	0.502088	0.532615	0.612278	0.696284	0.833333	0.45978	0.477624	0.749371	0.628486	1.02983	0.978135	0.386047	0.353488	0.333348	1.93953	1.81395	1.48271	0.644197	2.08405
潘明骏	男	34	R	d	A	0.413081	0.203455	0.492531	-0.648743	2.38201	7.37529	0.983184	6.97978	0.983184	0	0.00594682	0.035716	0.17439	0.239514	0.283483	0.318865	0.352771	0.391098	0.432499	0.473697	0.502012	0.518032	0.532116	0.552107	0.575682	0.588436	0.60494	0.638449	0.690803	0.706643	0.467063	0.521081	0.841276	0.867957	0.993114	1.04793	0.408964	0.397759	0.378449	1.78151	1.59664	1.37526	0.688495	1.97948
王胜	男	34	L	d	A	0.34137	0.145608	0.42654	-0.391834	1.98449	7.56906	0.989228	6.91336	0.989228	0	0.0961004	0.135036	0.160966	0.18718	0.212984	0.245289	0.280259	0.315037	0.343381	0.370247	0.395586	0.416667	0.432131	0.445369	0.468458	0.490305	0.50185	0.513277	0.529409	0.580271	0.423139	0.447351	0.773312	0.754828	1.05486	1.06012	0.397759	0.330532	0.323495	2.02801	1.94398	1.72503	0.669256	2.25382
季骆阳	男	35	R	d	A	0.377648	0.187613	0.496794	-0.0603777	2.09453	7.6853	0.986203	7.29999	0.986203	0	0.048556	0.134209	0.172141	0.208392	0.240339	0.271959	0.296951	0.319871	0.333333	0.357239	0.395396	0.428894	0.464284	0.5	0.534532	0.569234	0.607792	0.649385	0.674012	0.739804	0.435577	0.469297	0.802899	0.666658	0.708911	0.623879	0.484848	0.428904	0.395583	1.94872	1.31935	1.16025	0.80982	2.22505
吴建生	男	37	L	d	A	0.406361	0.147911	0.363988	-0.14757	2.51944	7.55939	0.992659	7.09906	0.992659	0	0.158737	0.204128	0.255775	0.293071	0.3141	0.327859	0.340105	0.35679	0.376972	0.401202	0.427391	0.452775	0.476543	0.493922	0.511157	0.535865	0.568596	0.61829	0.649852	0.694749	0.463166	0.515481	0.855384	0.735125	0.958038	0.848061	0.455556	0.383333	0.373903	1.92222	1.82778	1.60059	0.73142	2.10887
李欣	男	38	L	d	A	0.403231	0.236053	0.585404	0.0862286	1.47364	6.89032	0.981541	6.65808	0.981541	0	0.0524253	0.10744	0.150219	0.179262	0.206063	0.235647	0.263254	0.286122	0.305951	0.325206	0.353067	0.482568	0.620853	0.673537	0.685517	0.692255	0.693163	0.696464	0.699538	0.833333	0.465758	0.523963	0.832202	0.598185	0.779315	0.481484	0.432558	0.404651	0.378562	1.82791	1.74884	1.60799	0.702261	1.98782
李贵超	男	39	R	d	A	0.395394	0.188101	0.475732	0.0820711	2.16025	7.47454	0.987813	7.21047	0.987936	0.0016408	0.0859888	0.15564	0.197386	0.235983	0.26914	0.293956	0.312391	0.331261	0.34926	0.369656	0.393066	0.420293	0.453807	0.491779	0.543824	0.606319	0.661306	0.687909	0.698347	0.833333	0.433622	0.469058	0.883607	0.715833	0.818026	0.728269	0.486111	0.416667	0.392247	1.97222	1.8287	1.73801	0.802941	2.18708
陈晓波	男	41	L	d	A	0.319588	0.162276	0.507765	-0.100563	2.54901	7.56896	0.983924	7.1253	0.983924	0	0.0111573	0.0769352	0.140115	0.181726	0.216644	0.248807	0.273998	0.295278	0.311019	0.324637	0.337008	0.350378	0.368696	0.398841	0.432541	0.464812	0.5	0.534874	0.578499	0.715223	0.460501	0.507547	0.650731	0.576461	0.594951	0.486955	0.427778	0.388889	0.369811	1.73333	1.63333	1.47188	0.663148	1.9135
李强	男	41	L	d	A	0.528335	0.141781	0.268355	-0.598792	3.01698	6.85842	0.995949	6.61978	0.996037	0.00501042	0.287147	0.344879	0.38259	0.408436	0.434242	0.45772	0.476543	0.494053	0.508101	0.524476	0.546706	0.57793	0.614132	0.640975	0.668712	0.690239	0.697162	0.699282	0.700346	0.833333	0.508378	0.592828	1.05054	0.86	1.26033	0.932	0.446512	0.381395	0.3624	1.70698	1.6093	1.46828	0.629746	1.8827
王来	女	42	R	d	A	0.439417	0.127063	0.289163	-0.7345	3.03145	7.29463	0.994916	6.856	0.995151	0.00907798	0.18744	0.247517	0.295278	0.327118	0.360836	0.395396	0.416667	0.436339	0.455906	0.468458	0.480948	0.493877	0.505475	0.517045	0.527296	0.539695	0.558273	0.582108	0.607331	0.692175	0.49607	0.56647	0.865028	0.766428	0.894051	0.839794	0.483333	0.311111	0.311824	2.07222	1.75278	1.41739	0.657901	2.21841
缪利民	男	42	R	d	A	0.442814	0.150781	0.340506	-0.381312	2.9933	7.3193	0.993296	6.94533	0.993296	0	0.172976	0.240339	0.304841	0.331555	0.353575	0.372505	0.390975	0.408099	0.422631	0.440904	0.464135	0.48494	0.502241	0.520514	0.540262	0.57721	0.62478	0.653569	0.688043	0.70399	0.468296	0.510865	0.93077	0.822788	1.4408	1.40462	0.734177	0.666667	0.62968	2.75105	2.62869	2.37687	1.77137	2.95572
戚伟刚	男	42	R	d	A	0.532003	0.108544	0.20403	-0.658669	2.67589	7.16007	0.99645	6.56938	0.997808	0.107839	0.333333	0.365949	0.398046	0.431135	0.462622	0.486303	0.502255	0.517612	0.532615	0.550398	0.566052	0.580708	0.594658	0.609546	0.62582	0.636407	0.648235	0.659947	0.667377	0.761963	0.450817	0.515791	1.23182	1.12147	1.39969	1.4114	0.451163	0.344186	0.334287	1.8093	1.65116	1.33274	0.614148	1.96065
李洪伟	男	42	R	d	A	0.495949	0.127576	0.257236	-0.599926	3.53978	7.06556	0.996237	6.80676	0.996323	0.00497427	0.273086	0.330716	0.363377	0.393699	0.417925	0.439481	0.462236	0.482086	0.498975	0.512893	0.523572	0.530979	0.54018	0.555083	0.57254	0.60631	0.643374	0.672488	0.692445	0.833333	0.465016	0.527091	1.08695	0.951723	1.43305	1.42309	0.404651	0.330233	0.334526	1.74884	1.67674	1.41465	0.582282	1.9501
李永辉	男	43	R	d	A	0.359043	0.185517	0.5167	0.363688	2.33211	7.3918	0.986011	7.13735	0.986162	0.00166057	0.0702361	0.129257	0.169326	0.206284	0.235129	0.256397	0.276908	0.292696	0.307487	0.323501	0.342153	0.369537	0.405125	0.442949	0.476428	0.513193	0.623726	0.684963	0.69417	0.833333	0.398887	0.39583	0.866264	0.734363	1.20528	1.03929	0.465116	0.395349	0.376671	1.73023	1.49767	1.38264	0.677512	1.87927
严峰	男	48	L	d	A	0.348251	0.167475	0.480904	-0.112333	2.44749	7.54179	0.986532	7.24089	0.986532	0	0.0402625	0.116573	0.160633	0.199124	0.235531	0.266026	0.289593	0.310827	0.331483	0.349493	0.373028	0.398841	0.422631	0.446926	0.47444	0.496006	0.520514	0.555352	0.630951	0.785363	0.454928	0.488843	0.707662	0.658461	0.699432	0.637115	0.699346	0.627451	0.56846	2.28105	1.90196	1.65247	1.32287	2.38529
沈爱玲	女	48	R	d	A	0.521636	0.200705	0.384761	-1.13184	3.19112	6.82025	0.990228	6.59048	0.990228	0	0.0357291	0.21278	0.282572	0.326472	0.396901	0.474029	0.518155	0.546514	0.575739	0.600538	0.625059	0.64852	0.662643	0.673985	0.686105	0.693962	0.697162	0.6992	0.700346	0.833333	0.511465	0.59488	1.02599	1.01718	1.19414	1.25394	0.458333	0.402778	0.363697	1.89815	1.62037	1.36152	0.713906	2.03065
彭维军	男	50	R	d	A	0.446897	0.202558	0.453253	-0.248781	1.97948	6.83567	0.987485	6.5352	0.987485	0	0.0789086	0.203049	0.245289	0.273205	0.296951	0.316289	0.333333	0.35679	0.376811	0.416667	0.47444	0.533934	0.601159	0.645586	0.679252	0.68746	0.690124	0.690124	0.690803	0.758346	0.491611	0.549614	0.880701	0.726314	1.11528	0.866823	0.386555	0.364146	0.340565	1.68627	1.38655	1.19812	0.59343	1.86486
pwj2	男	51	R	d	A	0.409727	0.123261	0.300837	0.328801	3.04137	7.20224	0.995073	6.67458	0.995301	0.00888317	0.234732	0.283483	0.306415	0.320411	0.328175	0.335159	0.345296	0.357852	0.373028	0.390975	0.408099	0.421553	0.435917	0.455597	0.476543	0.510798	0.543105	0.62478	0.653569	0.678629	0.479613	0.548556	0.833936	0.667614	0.921378	0.715102	0.361111	0.282407	0.273209	1.73611	1.69444	1.60323	0.486218	2.05344
包幼玲	女	65	L	d	A	0.331996	0.180669	0.544191	0.375823	2.20857	7.5858	0.984087	7.32583	0.98418	0.000822872	0.0666874	0.123042	0.146723	0.166667	0.189834	0.216869	0.243019	0.266351	0.284777	0.300748	0.318204	0.343096	0.375343	0.418468	0.473229	0.517017	0.564016	0.618926	0.663499	0.833333	0.437019	0.494916	0.731625	0.579216	0.908772	0.728218	0.404651	0.367442	0.332078	1.46047	1.30233	1.16494	0.493348	1.52973
陈乐	女	27	R	d	N	0.357726	0.153022	0.427762	-0.377106	2.56711	7.55874	0.988706	7.15194	0.988706	0	0.0471009	0.14629	0.202861	0.237063	0.262453	0.283297	0.303284	0.321938	0.34296	0.362086	0.384051	0.403398	0.428058	0.461695	0.488911	0.504939	0.521251	0.546187	0.579452	0.75	0.526201	0.627408	0.639851	0.545089	0.730855	0.54313	0.376744	0.306977	0.29365	1.54884	1.32791	1.14614	0.463407	1.67355
陈乐	女	27	L	d	N	0.483868	0.166375	0.343844	-0.870596	3.36942	7.49478	0.992282	7.02718	0.992282	0	0.143695	0.280954	0.324931	0.351372	0.372771	0.401	0.436269	0.468479	0.493492	0.513491	0.533302	0.554784	0.577231	0.599979	0.620552	0.637404	0.653465	0.676234	0.696464	0.713086	0.487212	0.553074	0.992154	0.909269	0.990194	0.922402	0.353488	0.325581	0.305945	1.27442	1.21395	1.12522	0.397274	1.35405
wangzhen	女	28	L	d	N	0.390537	0.205211	0.525457	0.0948955	1.85301	7.3682	0.984547	7.11153	0.984547	0	0.0743135	0.126015	0.166667	0.197434	0.224729	0.251575	0.273686	0.298737	0.336276	0.379426	0.415442	0.452437	0.478919	0.503193	0.556724	0.64181	0.688376	0.69484	0.697362	0.833333	0.477564	0.559686	0.782524	0.633855	0.845637	0.696799	0.330233	0.306977	0.288898	1.6	1.53953	1.38264	0.471044	1.74446
wangzhen	女	28	R	d	N	0.423202	0.15308	0.361718	0.282273	2.45528	7.21182	0.992864	6.94198	0.993175	0.0084926	0.206629	0.262447	0.289781	0.306038	0.317814	0.328725	0.339827	0.353966	0.369343	0.386789	0.405201	0.426997	0.456255	0.498987	0.535549	0.579898	0.629848	0.678629	0.696464	0.833333	0.459219	0.4766	0.905947	0.768986	1.18287	1.10597	0.348837	0.297674	0.292686	1.66047	1.54651	1.27241	0.496485	1.86968
xumeng	男	28	R	d	N	0.444241	0.185819	0.418284	-0.357782	2.15005	7.40358	0.989984	7.15476	0.989984	0	0.109404	0.177391	0.245221	0.284611	0.310012	0.327859	0.355437	0.384018	0.417892	0.459395	0.501021	0.532615	0.559336	0.576377	0.599034	0.629848	0.673386	0.6894	0.693163	0.833333	0.460439	0.504561	0.956043	0.898996	1.35222	1.24455	0.376744	0.316279	0.307825	2.10698	2	1.85202	0.661287	2.38193
周超	男	28	R	d	N	0.459708	0.120351	0.261798	0.166514	2.31842	7.5879	0.992929	6.82653	0.99661	0.136789	0.275418	0.309683	0.333333	0.351758	0.369927	0.386789	0.40278	0.417298	0.432457	0.448208	0.46507	0.483145	0.50101	0.525401	0.552383	0.576774	0.598278	0.628351	0.684836	0.716066	0.472708	0.503966	0.965078	0.827054	1.04306	0.761505	0.409302	0.376744	0.359075	1.82791	1.73488	1.41504	0.6649	2.01103
周超	男	28	L	d	N	0.378762	0.156845	0.414099	0.28844	2.53928	7.41146	0.990908	7.15278	0.990953	0.000837878	0.12871	0.199296	0.236278	0.257323	0.275942	0.290939	0.306312	0.319353	0.334249	0.350615	0.368207	0.390115	0.416667	0.447309	0.486534	0.523623	0.570037	0.628061	0.674447	0.833333	0.459589	0.495249	0.795267	0.659325	0.775234	0.623319	0.348837	0.293023	0.285759	1.71628	1.64419	1.3839	0.502261	1.87639
张优	女	28	R	d	N	0.392503	0.156963	0.399903	-0.225787	2.86017	7.43617	0.990283	7.1764	0.990283	0	0.102657	0.182975	0.243993	0.287446	0.309619	0.320582	0.333333	0.347281	0.364263	0.38483	0.410511	0.434138	0.45624	0.477355	0.5	0.52506	0.562451	0.59926	0.657784	0.833333	0.528459	0.619216	0.713094	0.588812	1.08439	1.00918	0.32093	0.255814	0.259428	1.45581	1.35349	1.16325	0.385679	1.58975
张优	女	28	L	d	N	0.444663	0.214786	0.483032	-0.49375	1.96487	7.48204	0.985272	7.22459	0.985353	0.000915819	0.0454925	0.114316	0.166667	0.218274	0.272038	0.316632	0.365775	0.411564	0.451564	0.490787	0.523161	0.559946	0.597171	0.624821	0.646763	0.664623	0.679958	0.690314	0.697386	0.833333	0.495602	0.618853	0.880007	0.773076	0.939927	0.787812	0.395349	0.316279	0.305943	1.54419	1.4093	1.20222	0.48106	1.64961
战世伟	男	29	R	d	N	0.46433	0.210345	0.453008	-0.260786	1.56041	6.92648	0.987982	6.64695	0.988903	0.0159635	0.137739	0.171275	0.202911	0.240169	0.272684	0.295786	0.323904	0.372777	0.443642	0.5	0.541462	0.591043	0.646275	0.678629	0.691048	0.694458	0.696693	0.698827	0.700094	0.833333	0.482266	0.557943	0.950047	0.857143	0.967307	0.954005	0.427907	0.386047	0.3838	1.92093	1.8814	1.72581	0.735533	2.1564
战世伟	男	29	L	d	N	0.34005	0.160129	0.470899	0.159391	2.4394	7.69143	0.987927	7.21413	0.987927	0	0.0717988	0.14181	0.17955	0.206576	0.234732	0.259124	0.279547	0.294478	0.307991	0.318865	0.333333	0.353966	0.380896	0.409222	0.453135	0.49899	0.539893	0.583333	0.62048	0.715468	0.449002	0.492419	0.708141	0.597612	0.854904	0.776388	0.386047	0.339535	0.318726	1.83256	1.3814	1.25542	0.627107	2.07901
gaomeng	女	32	L	d	N	0.41959	0.219929	0.524151	0.0362598	1.62995	6.83194	0.984462	6.59814	0.984462	0	0.0890806	0.14243	0.186713	0.222597	0.251734	0.272265	0.286428	0.301304	0.318213	0.352427	0.451778	0.491117	0.533356	0.647817	0.693557	0.698298	0.69937	0.700346	0.704027	0.833333	0.482866	0.556171	0.850295	0.613546	1.13065	0.768693	0.32093	0.255814	0.244796	1.8093	1.55814	1.3242	0.468729	2.02309
gaomeng	女	32	R	d	N	0.507667	0.149107	0.293709	-0.590149	3.15176	7.05853	0.994854	6.7908	0.995012	0.00645015	0.28101	0.322589	0.350718	0.378713	0.400379	0.423269	0.452073	0.475687	0.494314	0.511423	0.531576	0.553074	0.580549	0.614184	0.647817	0.674833	0.690979	0.696016	0.699538	0.833333	0.482648	0.536593	1.06341	0.935858	1.13073	1.10006	0.348837	0.306977	0.286131	1.7814	1.47907	1.24996	0.519351	1.91701
Joshua	男	33	R	d	N	0.474635	0.122487	0.258065	-0.710665	3.70927	7.15476	0.995973	6.83684	0.996153	0.00893546	0.273663	0.31196	0.341963	0.36336	0.389279	0.418542	0.440521	0.462027	0.481535	0.49891	0.512252	0.524856	0.536348	0.547211	0.560347	0.5746	0.592305	0.611204	0.648124	0.809876	0.441474	0.457989	1.08993	1.12689	0.996106	0.830619	0.316279	0.302326	0.279249	1.68837	1.40465	1.18674	0.480476	1.82357
Joshua	男	33	L	d	N	0.335681	0.129369	0.385392	-0.474189	3.22698	7.56648	0.991038	6.89353	0.991038	0	0.0565628	0.152198	0.21832	0.25062	0.280979	0.297205	0.309774	0.319799	0.327844	0.337271	0.349833	0.364103	0.379094	0.396633	0.417961	0.441285	0.46655	0.498388	0.546279	0.622308	0.44004	0.447718	0.722803	0.667274	0.982842	1.03648	0.395349	0.344186	0.321025	1.8093	1.76279	1.48004	0.593791	1.96345
ganle	男	35	L	d	N	0.472741	0.231974	0.490701	-0.788998	2.14523	7.06502	0.983495	6.80559	0.984005	0.00495046	0.0205597	0.063388	0.139823	0.229869	0.301014	0.344062	0.405822	0.487107	0.548556	0.592044	0.618385	0.636645	0.653569	0.662757	0.668081	0.67334	0.678376	0.684857	0.693358	0.833333	0.475721	0.564764	0.992187	1.05624	0.879543	0.963482	0.404651	0.372093	0.347153	1.71628	1.63721	1.47452	0.60543	1.83054
ganle	男	35	R	d	N	0.455312	0.139755	0.306943	-0.0338929	2.31261	7.27061	0.992997	6.88488	0.995123	0.0708802	0.228711	0.273234	0.29552	0.316743	0.345043	0.375398	0.399803	0.421566	0.442513	0.461975	0.481568	0.499053	0.516522	0.531465	0.543508	0.565809	0.613179	0.679209	0.69498	0.833333	0.439	0.471133	1.04643	0.972285	1.43717	1.47072	0.423256	0.334884	0.336141	1.70233	1.42093	1.18657	0.586479	1.89326
zhangjian	男	35	L	d	N	0.44831	0.174092	0.388329	-0.354574	2.16918	7.48387	0.991418	7.23751	0.991418	0	0.153486	0.195056	0.251616	0.290939	0.316303	0.337135	0.367027	0.400714	0.438336	0.468606	0.493048	0.524252	0.549713	0.574623	0.59926	0.62422	0.644938	0.671866	0.693557	0.833333	0.455821	0.502356	0.979197	0.915313	1.0855	0.895661	0.367442	0.344186	0.329021	1.64651	1.58372	1.36469	0.553986	1.82157
覃杰	男	35	R	d	N	0.418627	0.215316	0.514337	-0.126694	1.75695	7.40461	0.985096	7.15201	0.985096	0	0.0597359	0.127073	0.175607	0.216869	0.248288	0.276591	0.301288	0.325259	0.357825	0.402198	0.458498	0.505279	0.550285	0.601374	0.64181	0.675614	0.693233	0.69737	0.700346	0.833333	0.433145	0.486444	0.95797	0.792771	0.996089	0.92734	0.409302	0.353488	0.345507	2.00465	1.76279	1.53831	0.705203	2.19904
覃杰	男	35	L	d	N	0.489154	0.221915	0.453672	-0.712046	2.24139	6.62539	0.987093	6.40906	0.987093	0	0.0248563	0.133901	0.223603	0.285453	0.320324	0.35747	0.409887	0.452667	0.512504	0.561492	0.610899	0.643329	0.67657	0.696464	0.698347	0.6992	0.69995	0.700346	0.704096	0.833333	0.474191	0.527503	1.04017	1.07278	1.34828	1.59386	0.530233	0.44186	0.414825	1.75814	1.60465	1.37197	0.736333	1.83744
shuixiaolong	男	37	L	d	N	0.524401	0.179948	0.343149	-0.724528	2.23196	6.84382	0.993325	6.59727	0.993325	0	0.197923	0.258955	0.296755	0.324334	0.360425	0.395956	0.468338	0.529781	0.568799	0.603428	0.62338	0.642593	0.657522	0.675474	0.687588	0.694811	0.69737	0.699447	0.70086	0.833333	0.490089	0.56254	1.09365	1.10003	1.28187	1.34147	0.469767	0.376744	0.360618	1.88837	1.76279	1.47081	0.697653	2.01273
shuixiaolong	男	37	R	d	N	0.418589	0.185856	0.444006	-0.35744	2.32128	7.55535	0.988305	7.3118	0.988305	0	0.052024	0.161965	0.210685	0.260078	0.287342	0.316059	0.343957	0.376035	0.407301	0.441845	0.466917	0.485327	0.50516	0.534502	0.567098	0.598393	0.633427	0.665672	0.695797	0.833333	0.442973	0.461395	0.929774	0.941731	1.11121	1.18981	0.432558	0.355814	0.333479	1.85116	1.2093	1.18322	0.63537	2.05434
liguichao	男	39	R	d	N	0.40415	0.196324	0.485771	0.0174764	2.02233	7.45623	0.987063	7.18992	0.987193	0.0016408	0.0787146	0.149976	0.192287	0.230637	0.265829	0.292701	0.313092	0.332405	0.354568	0.378226	0.408908	0.439173	0.475724	0.521081	0.580763	0.640652	0.673943	0.695754	0.699282	0.833333	0.432646	0.466717	0.91424	0.751579	0.833472	0.598564	0.427907	0.395349	0.361938	2.03256	1.90233	1.72375	0.75364	2.16374
华英汇	男	40	R	d	N	0.430771	0.178404	0.41415	-0.17711	2.08435	7.44438	0.990422	7.19763	0.990481	0.00115339	0.132167	0.177676	0.218628	0.260323	0.301897	0.331698	0.358893	0.384051	0.406746	0.428208	0.45952	0.490506	0.51616	0.541365	0.574022	0.619455	0.657251	0.687125	0.693557	0.833333	0.450685	0.479656	0.944992	0.866955	1.34858	1.38011	0.4	0.316279	0.315405	1.77674	1.62093	1.43196	0.564608	1.96553
华英汇	男	40	L	d	N	0.480084	0.163661	0.3409	-0.461326	2.13603	7.26672	0.993621	7.01209	0.993671	0.00166057	0.198258	0.256923	0.287147	0.306961	0.32771	0.369927	0.412839	0.463132	0.497988	0.5171	0.532969	0.553496	0.572272	0.598911	0.628354	0.650878	0.664578	0.676018	0.692255	0.833333	0.512913	0.600993	0.918687	0.822196	0.982084	0.773366	0.44186	0.4	0.378362	1.81395	1.69767	1.50054	0.693088	1.93726
黄自强	男	40	R	d	N	0.489648	0.169345	0.34585	-0.40655	2.17593	7.12402	0.99343	6.8871	0.99343	0	0.213878	0.265973	0.295227	0.313485	0.343811	0.377574	0.416667	0.458553	0.485179	0.501032	0.523086	0.563025	0.598938	0.633126	0.653074	0.673529	0.692891	0.698251	0.700094	0.833333	0.469665	0.529763	1.05347	0.922813	1.06468	0.967877	0.44186	0.390698	0.372465	1.73953	1.57442	1.47057	0.6543	1.86729
黄自强	男	40	L	d	N	0.568895	0.124631	0.219075	-0.651177	2.31593	6.76782	0.996092	6.32461	0.997503	0.108051	0.334294	0.380073	0.412942	0.447326	0.477186	0.502943	0.524499	0.54774	0.570799	0.597878	0.624879	0.642439	0.66072	0.676032	0.689653	0.695984	0.69737	0.699447	0.702383	0.833333	0.511954	0.599124	1.1469	0.997306	1.15153	1.09757	0.432558	0.386047	0.367533	1.88837	1.79767	1.61439	0.704554	2.017
陈小婷	女	42	R	d	N	0.440893	0.200454	0.454655	-0.105987	1.80138	6.988	0.988035	6.72218	0.988247	0.00334766	0.123735	0.168358	0.219364	0.248725	0.280979	0.309982	0.335106	0.363821	0.393928	0.423269	0.459982	0.497594	0.54611	0.617193	0.683763	0.692445	0.693557	0.696464	0.697386	0.833333	0.487821	0.550037	0.889171	0.746833	1.15481	1.02489	0.395349	0.209302	0.245376	1.74884	1.26977	1.14429	0.443007	1.98202
陈小婷	女	42	L	d	N	0.341136	0.203047	0.595209	0.321156	1.99022	7.53811	0.980535	7.27492	0.980535	0	0.0332739	0.0877079	0.139091	0.166667	0.186062	0.20819	0.226886	0.247812	0.269872	0.291492	0.322856	0.363382	0.415372	0.465013	0.510626	0.5518	0.617193	0.672613	0.692445	0.833333	0.425578	0.450819	0.761341	0.599151	0.943181	0.851127	0.339535	0.316279	0.296022	1.61395	1.3093	1.11168	0.488069	1.75025
zhuzhonglin	男	45	R	d	N	0.431688	0.142259	0.329541	0.0648241	2.74843	7.10148	0.994229	6.85668	0.994229	0	0.226886	0.276504	0.304841	0.321706	0.331555	0.342104	0.35679	0.374067	0.395038	0.414249	0.435453	0.456308	0.480682	0.502065	0.520514	0.563155	0.607331	0.653569	0.688043	0.833333	0.427782	0.455906	1.01145	0.878562	1.09314	0.892518	0.325581	0.283721	0.276436	1.95814	1.89302	1.67499	0.551714	2.1546
倪卫祖	男	49	R	d	N	0.378378	0.197249	0.521301	0.0630472	2.11112	7.47966	0.984445	7.23827	0.984445	0	0.0228841	0.13126	0.178837	0.214309	0.24502	0.270491	0.290749	0.307017	0.320829	0.340371	0.371647	0.414249	0.457649	0.494219	0.540135	0.588766	0.640849	0.679077	0.69937	0.833333	0.459508	0.534911	0.793603	0.585543	1.24951	1.4351	0.413953	0.372093	0.336776	1.63721	1.44186	1.31234	0.555868	1.69232
倪卫祖	男	49	L	d	N	0.427162	0.163522	0.382811	-0.0378709	2.11525	7.40791	0.991992	7.15604	0.991992	0	0.187131	0.235187	0.258848	0.276708	0.294979	0.311621	0.325027	0.353966	0.388408	0.42229	0.457093	0.485531	0.508221	0.529763	0.563025	0.594716	0.630252	0.660641	0.689129	0.833333	0.46089	0.532615	0.913995	0.751068	1.04876	0.813114	0.372093	0.306977	0.295894	1.62326	1.50233	1.31863	0.489259	1.72621
孙德弟	男	58	R	d	N	0.372298	0.177415	0.476538	0.398343	2.35407	7.41711	0.988111	7.15207	0.988579	0.00659896	0.100169	0.156796	0.196177	0.229936	0.253805	0.275942	0.29399	0.309145	0.322746	0.338844	0.35623	0.376438	0.400301	0.430112	0.479961	0.553496	0.62229	0.673175	0.699108	0.833333	0.450747	0.504375	0.769358	0.605575	0.799268	0.569203	0.474419	0.432558	0.404761	1.77209	1.71628	1.49635	0.714959	1.90405
孙德弟	男	58	L	d	N	0.416119	0.244019	0.586416	-0.146622	1.52639	6.7496	0.980147	6.48181	0.980147	0	0.0192423	0.0756819	0.130604	0.162992	0.201534	0.243463	0.277296	0.303873	0.333333	0.394981	0.483354	0.546122	0.637877	0.659498	0.695337	0.696464	0.697439	0.699282	0.699696	0.833333	0.482043	0.577	0.81372	0.664333	0.97995	0.861302	0.44186	0.381395	0.356778	2.06047	1.96047	1.69147	0.743148	2.19002
[truncated: 7 more columns]
